1 **The males of the parasitoid wasp, *Nasonia vitripennis*, can identify which fly hosts contain females.**

2

3 <sup>1</sup>Garima Prazapati, <sup>2</sup>Ankit Yadav, <sup>2</sup>Anoop Ambili, <sup>1</sup>Abhilasha Sharma, <sup>1\*</sup>Rhitoban Raychoudhury

4

5

6

7

8 <sup>1</sup>Department of Biological Sciences, Indian Institute of Science Education and Research (IISER) Mohali, Knowledge City,

9 Sector- 81, Manauli P.O. 140306, India

10 <sup>2</sup>Department of Earth and Environmental Sciences, Indian Institute of Science Education and Research (IISER) Mohali,

11 Knowledge City, Sector- 81, Manauli P.O. 140306, India

12

13

14

15 \*Correspondence: [rhitoban@iisermohali.ac.in](mailto:rhitoban@iisermohali.ac.in)

16

17

18

19

20

21

22

23

24

25

26

27

28

29

30

31

32

### 33 **Introduction**

34 In most sexually reproducing organisms, male reproductive success is limited by the number of fertile females it can mate.  
35 In contrast, female reproductive success is mainly limited by the number of eggs produced (Bateman, 1948). This difference  
36 necessitates distinct reproductive strategies for both (Gross, 1996). For a male, the ideal reproductive strategy involves  
37 rapid sexual maturation and access to many fertile females (Kappeler, 2012; Muller and Thompson, 2012). To achieve this,  
38 males have evolved several mate-finding strategies (Andersson, 1994). In male parasitoid wasps, finding many females is  
39 relatively easy as most species show a female-biased sex ratio (Godfray, 1994). Despite this, male parasitoid wasps adopt  
40 various mate-finding strategies to maximize individual fitness. These include the use of trail sex pheromone deposited by  
41 females in *Aphelinus asychis* (Fauvergue *et al.*, 1995), *Aphytis melinus* (Bernal and Luck, 2007), and *Trichogramma brassicae*  
42 (Pompanon *et al.*, 1997). *Urolepis rufipes* use territorial markings (Cooper and King, 2015) and emergence sites of con-  
43 specific males (Wittman *et al.*, 2016) to attract females. In some parasitoid wasps, mate-finding involves using chemical  
44 cues from the hosts themselves (Vinson, 1976). *Pimpla disparis* males use vibratory or acoustic cues emanating from  
45 developing wasps inside the gypsy moth (*Lymantria dispar*) host (Hrbar *et al.*, 2012; Danci *et al.*, 2014). *Cephalonomia*  
46 *tarsalis* (Collatz *et al.*, 2009) use host-associated sex pheromones for finding mates whereas, *Lariophagus distinguendus*  
47 (Steiner *et al.*, 2007) males use volatile cues, other than sex pheromones, to do so.

48  
49 No specific mate-finding strategy has been uncovered in the pteromalid wasp *Nasonia*, one of the most extensively studied  
50 parasitic wasp (Mair and Ruther, 2019). The haplodiploid parasitoid wasp genus, *Nasonia*, comprises four species, *N.*  
51 *vitripennis*, *N. longicornis*, *N. giraulti*, and *N. oneida* (Raychoudhury *et al.*, 2010), and parasitizes on cyclorrhaphous fly  
52 pupae. The female locates a suitable fly pupa (host), drills through the puparium by its ovipositor, paralyzes the fly pupa by  
53 injecting it with venom, and then lays eggs (Whiting, 1967). The entire holometabolous life-cycle, from eggs to adults,  
54 happens inside the host, and the adults emerge by chewing an emergence hole through the host's puparium. Although all  
55 four *Nasonia* species have a female-biased offspring sex ratio, curiously, it is the male which usually emerges first (Cousin,  
56 1933) and waits around for emerging females (Werren, 1980). Mating happens quickly, and the females then fly away in  
57 search of newer hosts to parasitize. Little is known whether the males possess any other strategy to find mates or are even  
58 capable of actively seeking out females beyond hanging around the emergence holes. However, several biological features  
59 of *Nasonia* indicate that males can be under relatively intense selection pressure to evolve strategies looking for females  
60 beyond their natal host. *Nasonia* females parasitize hosts available as a patchy resource, and the female often parasitizes  
61 as many as she can (Godfray, 1997). Therefore, most of the emerging progeny are relatively close to each other and within  
62 reach of any emerged male.

63 Moreover, the males are reproductively mature as soon as they emerge with a full complement of functional sperm  
64 (Chirault, 2016) and do not leave their natal patch (Van den Assem and Vernel, 1979). Since females mate only once  
65 (Grillenberger *et al.*, 2008), males can fertilize many females. Males compete to access females by aggressively defending  
66 the host puparium from which they emerge and never leaving the natal host (Leonard and Boake, 2006). This intrasexual  
67 aggression can also be a trigger for additional strategies for finding mates. One such possibility is the ability to detect hosts

68 about to release adult females. There is some evidence that males can recognize parasitized fly hosts as they spend  
69 significantly more time on them than unparasitized ones (King *et al.*, 1969). However, what remains unknown is whether  
70 this ability extends to finding out whether a parasitized host will have females inside to mate with, as *Nasonia* is a  
71 haplodiploid wasp, and some hosts might have all-male broods. This study conducts a comprehensive investigation of this  
72 potential mate-finding strategy across the four *Nasonia* species by determining their preference for differentially  
73 parasitized fly hosts of various development stages. We also determine the nature of the cues (auditory, visual, or olfactory)  
74 utilized by the males and identify the olfactory cues' chemical nature by GC-MS. We find a species-specific mate finding  
75 strategy that depends on males' ability to detect different concentrations of chemicals involved in olfaction.

76

## 77 **Results**

### 78 ***Nasonia* males can detect parasitized hosts**

79 We first established whether *Nasonia* males can detect parasitized hosts within a given patch which also contains  
80 unparasitized ones. Males were given a choice between two-day old parasitized (HwL) and unparasitized hosts. As figure 1  
81 (a) indicates, males of all four species can detect which hosts are parasitized as they spent significantly more time on them  
82 ( $p < 0.01$ ,  $r = 0.8$  for *N. vitripennis*;  $p < 0.01$ ,  $r = 0.8$  for *N. longicornis*;  $p < 0.01$ ,  $r = 0.6$  for *N. giraulti* and  $p < 0.01$ ,  $r = 0.8$  for  
83 *N. oneida*). However, each HwL has larval wasps inside it and is several days away from adult wasp eclosion which can  
84 extend well beyond the life span of an adult male. Hence, to test whether males can detect parasitized hosts which contain  
85 eclosed adults (HwAMF), a choice was given between such hosts and unparasitized ones. As figure 1 (b) shows, males of all  
86 the four species spent significantly more time on HwAMF ( $p < 0.001$ ,  $r = 0.8$  for *N. vitripennis*;  $p < 0.01$ ,  $r = 0.6$  for *N.*  
87 *longicornis*;  $p = 0.01$ ,  $r = 0.4$  for *N. giraulti* and  $p < 0.001$ ,  $r = 0.8$  for *N. oneida*). Thus, *Nasonia* males can identify hosts which  
88 contain larval as well as adult wasps. However, as mentioned above, detecting larval wasps will add little to the reproductive  
89 success of any male. Therefore, we gave a choice between these two types of hosts (HwL and HwAMF) to determine  
90 whether males have the capability to distinguish which host has adult wasps inside. Interestingly, *N. vitripennis* ( $p < 0.01$ ,  $r$   
91  $= 0.5$ ) and *N. oneida* ( $p = 0.01$ ,  $r = 0.5$ ) showed a preference for HwAMF (figure 2 a) but *N. longicornis* ( $p = 0.7$ ,  $r = 0$ ) and *N.*  
92 *giraulti* ( $p = 0.6$ ,  $r = 0.1$ ) did not. Thus, there is species-specific variation for this particular capability where *N. vitripennis*  
93 and *N. oneida* are able to identify adult wasps within the hosts but *N. longicornis* and *N. giraulti* cannot.

94

### 95 ***N. vitripennis* males can detect adult females within hosts**

96 *Nasonia* being a haplo-diploid wasp can also reproduce via arrhenotokous parthenogenesis, where unfertilized eggs will  
97 give rise to males, resulting in all-male broods. Thus, the capability to detect hosts containing adult wasps will add to the  
98 fitness of a male only if it can detect which hosts will yield adult females. Thus, *Nasonia* males were given a choice between  
99 hosts which had all-male adult broods (HwAM) and those that had the adults of both sexes (HwAMF). Interestingly, as figure  
100 2 b illustrates, only *N. vitripennis* showed a significant preference for the latter ( $p = 0.001$ ,  $r = 0.6$ ), while all the other three  
101 could not distinguish between them (*N. longicornis*,  $p = 0.3$ ,  $r = 0.1$ ; *N. giraulti*,  $p = 0.2$ ,  $r = 0.2$ ; *N. oneida*,  $p = 0.4$ ,  $r = 0.1$ ).  
102 Thus, *N. vitripennis* males are not only capable of detecting which host will yield adults, but they can also distinguish which

103 ones will have females in them. This proficiency is not affected even by the presence of adult males inside. Next, we  
104 investigated the possible cues that males of *N. vitripennis* utilize to elicit this phenotype.

105

#### 106 ***N. vitripennis* males do not use auditory and visual cues to detect adult females within hosts**

107 One of the possible cues that males can use is the sound coming from inside the host as the adult wasps eclose before  
108 emerging from the host. To test this possibility, *N. vitripennis* males were given a choice between hosts with alive adult  
109 wasps inside, and other hosts with dead (freeze-killed) adult wasps inside, thereby removing auditory cue coming from  
110 adults. As shown in figure 3 a, males of *N. vitripennis* did not show a preference ( $p = 1, r = 0$ ) for either type of host, indicating  
111 that they probably do not utilize auditory cues for detecting hosts with adult females inside.

112

113 Another possible cue that males can utilize is the physiochemical changes happening in the host as it develops. The  
114 puparium, which is the host pupa's outer casing, undergoes perceptible darkening with time (Sinha and Mahato, 2016) and  
115 can be a visual cue for discrimination. We investigated whether such puparial darkening can act as a visual cue by giving  
116 them a choice between puparial halves obtained from the anterior end of two-day-old unparasitized hosts and those  
117 obtained from ten-day-old unparasitized hosts (a day before adult fly eclosion, hence, maximally darkened. As figure 3 (b)  
118 shows, males did not distinguish between these two types of puparial halves and spent nearly equal time on both ( $p = 1, r$   
119  $= 0$ ). Therefore, puparial darkening is not a cue utilized by *N. vitripennis* males.

120

#### 121 ***N. vitripennis* males use olfactory cues to detect adult females within hosts**

122 *Nasonia* uses several olfactory cues during courtship (Van den Assem *et al.*, 1980), mate-choice (Ruther *et al.*, 2009; Ruther  
123 *et al.*, 2011), and even for species-recognition (Mair *et al.*, 2017; Buellesbach *et al.*, 2013; Buellesbach *et al.*, 2018). These  
124 olfactory cues can include cuticular lipids acting as contact sex-pheromones and other as yet unknown semiochemicals  
125 (Mair and Ruther, 2019). The ability of *N. vitripennis* females to recognize and assess the quality of a parasitized host is  
126 hypothesized to involve chemosensory cues (Blaul *et al.*, 2014; King and Rafai, 1970). However, whether *N. vitripennis* males  
127 use similar cues is not known.

128 There are two possible sources of olfactory cues that a male can utilize to locate adult females within hosts. The first is any  
129 olfactory cues left behind by a female during parasitization while the second can be any olfactory cues emanating from the  
130 wasps within the host. To test the first possibility, an unparasitized host was partially embedded in a foam plug, with only  
131 the anterior half exposed to the female for parasitization for 48 hours (SI - Figure S3). Males were given a choice between  
132 exposed puparial halves of such parasitized hosts (HWL) and those that were not exposed to females. Using just the puparial  
133 halves of the same age ensured that no other cues (visual, auditory, *etc.*) would influence the choice. As figure 4 (a) shows,  
134 males spent significantly more time ( $p < 0.001, r = 0.8$ ) on the puparial halves exposed to females, indicating that they can  
135 perceive any olfactory cues left behind by the female wasp.

136 Next, we tested whether the enclosed wasps were emanating any olfactory cues. The puparium of a host is a porous structure  
137 (Yoder and Denlinger, 1991), and, hence, males can perceive any olfactory cues coming from within. However, the host fly

138 ecloses within eleven days at 25 °C, while the wasps eclose by the fourteenth day. Therefore, the chronological age of the  
139 two types of hosts differs from the developing insects' physiological age. To minimize the effect of this disparity, males  
140 were given a choice between the puparial halves obtained from the anterior half of the two types of hosts *i.e.*, HwAMF and  
141 those containing adult fly (ten-day old). This ensured that the males were choosing between two types of puparial halves  
142 that had the maximum physiological age. Males spent significantly more time ( $p < 0.05$ ,  $r = 0.5$ ; figure 4 b) on the puparial  
143 halves of HwAMF, indicating that either the olfactory cues deposited by the parasitizing female persist throughout the life-  
144 cycle of the wasps or additional olfactory cues are emanating from the adult wasps within. Interestingly, when males were  
145 given a choice between the puparial halves of hosts containing adult wasps (HwAMF) and those containing larval ones  
146 (HwL), males prefer the former ( $p < 0.05$ ,  $r = 0.4$ ; figure 4 c). This indicates that either males can perceive any additional  
147 olfactory cues emanating from the adult wasps inside or these adults are probably producing the cues at a higher  
148 concentration. It seems logical that males can be under selection to detect the latter source, as perceiving hosts containing  
149 adult wasps would substantially increase the chance of encountering mates.

150 To confirm whether the cues utilized by *N. vitripennis* males is olfactory in nature, the puparial halves of HwAMF were  
151 dipped in dichloromethane (DCM) for 20 minutes and the obtained extract was pipetted out in a separate glass vial. Male  
152 preference was tested towards the extract poured over puparial halves of unparasitized hosts against those poured over  
153 with only DCM. As figure 4 (d) indicates, males spent significantly more time on the puparial halves with the extract ( $p <$   
154  $0.05$ ,  $r = 0.6$ ). This confirms that they utilize olfactory cues to identify hosts containing potential mates, since all other cues  
155 (visual and auditory) that could otherwise influence such a choice were absent.

156 To identify the chemical nature of the olfactory cues, the polar and non-polar fractions were separately enriched through  
157 column chromatography (see Methods). The polar fraction of the extract usually contains sex-pheromones and polar lipids  
158 such as cholesterol, free fatty acids, *etc.* The non-polar component contains lipids such as cuticular-hydrocarbons (CHCs)  
159 (Mair *et al.*, 2017; Carlson *et al.*, 1998; Carlson *et al.*, 1999). Male preference was tested towards each of these fractions  
160 and as figure 4 (e) shows, they prefer the non-polar fraction ( $p < 0.01$ ,  $r = 0.8$ ) and not the polar fraction ( $p = 0.3$ ,  $r = 0.2$ ;  
161 figure 4 f). This indicates that the source of the olfactory cues is present in the non-polar fraction and since it is enriched  
162 for CHCs, these could be the source of the olfactory cue.

### 163 ***N. vitripennis* males utilize cuticular hydrocarbons (CHCs) of females, as olfactory cues, to detect adult females within** 164 **hosts**

165 GC-MS of the non-polar fraction obtained from HwAMF and HwAM identified an array of long-chain saturated as well as  
166 unsaturated hydrocarbons with carbon chain lengths ranging from  $nC_{25}$ -  $nC_{37}$ , mostly consisting of *n*-alkanes, alkenes,  
167 mono-, di-, tri-, and tetra-methyl alkanes (Figure 5; SI - Table S1). The most abundant compound was Hentriacontane ( $nC$ -  
168 31) in both HwAMF and adult females, Nonacosane ( $nC$ -29) in HwAM and 7-methyltriacontane (MeC31 (7- )) in adult males.  
169 However, a comparative assessment of the CHC profiles of HwAMF and HwAM shows no detectable compositional change  
170 between the two as they share all the 53 compounds (SI - Table S1). A principal component analysis shows no clear

171 separation between the two profiles (Figure 6) unlike the adult male and female CHC profiles which also have no detectable  
172 compositional change, as noted by previous studies (Buellesbach *et al.*, 2013; Buellesbach *et al.*, 2018).

173 The ability of males to distinguish HwAMF from HwAM (figure 2 b) could be due to some unique CHCs emanating from the  
174 former. Interestingly, the HwAMF and HwAM profiles share 47 compounds with both the adult males and female profiles.  
175 However, all the compounds differ in their respective relative abundances between HwAMF and HwAM as well as between  
176 adult males and females (Figure 8; SI - Table S1). Hence, it is likely that the males utilize the differences in relative  
177 abundances of compounds found in HwAMF as recognition signature CHCs.

178 To investigate which signature CHCs are utilized by the males for detecting HwAMF, which contains both adult males and  
179 females, we tested whether males have the capability to distinguish between the adult male and female CHCs (see  
180 Methods). Males were given a choice between unparasitized hosts poured with CHC extract from adult females against  
181 those poured with the CHC extract from adult males. As figure 7 (a) shows, males prefer hosts with the CHC extract from  
182 adult females ( $p < 0.01$ ,  $r = 0.6$ ). This is not surprising as *Nasonia* males are known to utilize female CHCs for mate-  
183 recognition (Mair and Ruther, 2019; Buellesbach *et al.*, 2018; Steiner *et al.*, 2006). However, when their preference was  
184 checked for the adult male CHCs alone, males could not distinguish them from the solvent control ( $p = 0.2$ ,  $r = 0.2$ ; figure 7  
185 b) indicating that they do not utilize the male CHCs to detect hosts with adult females inside.

186 As figure 2 (b) shows, males prefer the hosts with females (HwAMF) over those with all-male broods (HwAM). The  
187 preference for HwAMF can be easily explained by the presence of females inside and hence, female CHCs in HwAMF,  
188 possibly in higher concentration than in HwAM. It is not known, however, whether *N. vitripennis* males are capable of  
189 distinguishing different concentrations of CHCs as olfactory cues. To test this ability the males were given a choice between  
190 two different concentrations of the same female CHC extract. Three unparasitized hosts were poured over with 1x  
191 concentration of CHCs extract while the other three were poured over with 5x concentration. As figure 7 (d) indicates,  
192 males prefer hosts with a higher concentration of female-signature CHCs ( $p = 0.01$ ,  $r = 0.5$ ). This capability was further  
193 confirmed by showing male preference towards 1x concentration of female CHCs versus control ( $p < 0.01$ ,  $r = 0.8$ ; figure 7  
194 c). Therefore, the males have the ability to detect differences in concentration of the individual CHC compounds and identify  
195 hosts containing eclosed, but un-emerged, females.

196

#### 197 **Which CHC component do the *N. vitripennis* males utilize to detect adult females within hosts?**

198 It is plausible that males are utilizing the relative abundance of various CHC compounds within the female profile for  
199 detecting HwAMF. Out of the 47 shared CHCs, only 9 compounds (Table 1; figure 8) have a higher (positive Cohen's  $d$ )  
200 relative abundance in HwAMF (compared to HwAM) as well as the adult females (compared to males). These belong to  
201 different types of Mono-, Di-, and Tetra-methyl alkanes with chain length  $> nC30$ . It is likely that the higher relative  
202 abundances of these 9 compounds act as the olfactory cue for detecting HwAMF. This is consistent with the basic biology  
203 of *Nasonia* which exhibits a female-biased sex ratio indicating that female CHCs should have a higher abundance than male  
204 CHCs.

205

## 206 Discussion

207 Our study shows that *N. vitripennis* males can seek out adult females inside the fly host using olfactory cues emanating from  
208 the females still inside the puparium. That males are attracted by female CHCs is not surprising. But what is remarkable is  
209 the males' ability to utilize the olfactory signature within the female CHC profile to detect hosts about to release adult  
210 females. Thus, it shows the presence of a solid, and as yet unknown, mate-finding strategy of *N. vitripennis* males. More  
211 surprisingly, this ability is restricted to *N. vitripennis* despite a very similar habitat and ecology for all the four *Nasonia*  
212 species. One possibility of why the other species, especially *N. giraulti*, do not show this ability is the phenomenon of within-  
213 host mating, where mating happens within the fly host before emergence. However, this still does not explain why the *N.*  
214 *longicornis* and *N. oneida* males do not have this ability as they show intermediate rates of within-host-mating (Giesbers *et*  
215 *al.*, 2016).

216 Males of all the four *Nasonia* species share the ability to distinguish parasitized hosts from unparasitized ones with other  
217 parasitoid wasps like *Pimpla disparis* (Hrabar *et al.*, 2012; Danci *et al.*, 2014), *Lariophagus distinguendus* (Steiner *et al.*,  
218 2005) and *Cephalonomia tarsalis* (Collatz *et al.*, 2009). But whether this ability also extends to distinguishing hosts  
219 containing females from those that do not, like *N. vitripennis*, is not clear. Therefore, the present study is one of the first  
220 reports of this mate-finding strategy employed by *N. vitripennis* males.

221 The capability of *N. vitripennis* males to distinguish between different concentrations of female CHCs (figure 7 d) underscore  
222 their ability to find, even in a patch, hosts with varying number of females inside. Assuming that the cues increase in  
223 intensity with the number of females inside a host, a male can now seek out hosts with the maximum number of females.  
224 This capability has the potential to further increase individual male fitness. Moreover, this ability can also explain why  
225 males can distinguish between HwL from unparasitized ones (Figure 1 a). In the former case, the males are probably  
226 detecting the olfactory cues left behind by the parasitizing females. But these cues get swamped out when given a choice  
227 with HwAMF as it usually contains several females inside. This ability can also potentially bring several males in contact  
228 with each other resulting in increased male-male conflict and then trigger selection for more aggressive male behaviour,  
229 both for access to females and territoriality. There is some evidence that this could have happened as *N. vitripennis* males  
230 are the most aggressive among the four species (Leonard and Boake, 2006; Giesbers *et al.*, 2016; Mair and Ruther, 2018).

231 Another curious phenomenon found in this study is the compositional uniformity of CHCs from hosts with and without  
232 females (Figure 8; SI - Table S1). This finding is consistent with other studies reporting such uniformity even in adult males  
233 and females (Ruther *et al.*, 2011; Steiner *et al.*, 2005). Yet, a male *N. vitripennis* can still detect adult females within hosts.  
234 Therefore, the most parsimonious explanation for this behaviour is the ability of males to detect variations of the individual  
235 CHC components from the two types of hosts and use that as female specific signature cue. We have analysed these  
236 variations across the adult male and female CHCs and have hypothesized a specific list serving as female specific signature  
237 (Table 1) which awaits further empirical validation.

238 The *Nasonia* genus represents one of the best-characterized insect model systems for understanding the chemical and  
239 behavioral basis of communication between the sexes (Mair *et al.*, 2019). Despite this accrued information, our study  
240 uncovers a previously unknown male mate-finding strategy in *N. vitripennis*. Moreover, *Nasonia* belongs to the superfamily

241 Chalcidoidea which has an estimated 500,000 species (Heraty *et al.*, 2013), making it one of the most speciose of any animal  
242 group. Many of these species share a similar idiobiont lifestyle with *Nasonia*. Even if a fraction of these species share the  
243 ability to detect females still inside their hosts, then this mate-finding strategy can be one of the most widespread in the  
244 animal kingdom.

245

#### 246 **Materials**

247 **Fly host used:** All *Nasonia* cultures were raised on pupae of the fly, *Sarcophaga dux*, which has a life-cycle of 11 days at  
248 25°C. The fly larvae were fed with chicken liver, and the pupae were stored at 4°C. The fly pupae kept at 4°C for ≤48 hours  
249 were used in all the experiments and are designated as 'unparasitized' hosts.

250 ***Nasonia* strains used:** The wasp strains of the four *Nasonia* species used were NV-IPU08 (a field strain obtained from  
251 Punjab, India) for *N. vitripennis*, NL-MN8501 for *N. longicornis*, NG-RV2XU for *N. giraulti*, and NO-NY11/36 for *N. oneida*.  
252 These were reared in a 24-hour light cycle at 25°C and 60% relative humidity and had an average life-cycle of 14 days for  
253 *N. vitripennis*, 14.5 days for *N. longicornis*, 15 days for *N. giraulti*, and 16 days for *N. oneida*. The different life-stages include  
254 egg (1-2 days), larva (2-7 days), pupa (8-12 days), and adult (13-16 days) (Whiting, 1967). One female (either mated or  
255 virgin) was provided with two unparasitized hosts for 48 hours and then removed. The parasitized hosts were either kept  
256 for wasps' emergence or used in the experiments as required. All experiments were done using parasitized hosts containing  
257 larval wasps (two-day post-parasitization) or eclosed adult wasps inside (thirteen-/fourteen/fifteen-days, depending on the  
258 species). The former has been abbreviated as HwL (hosts with larval wasps) and the latter as HwAMF (hosts with adult  
259 males and females)/HwAM (hosts with adult all-male broods). Experiments to investigate which cues are utilized by males  
260 were done with *N. vitripennis* (NV-IPU08).

261 **Behavioural assay and determination of cues used:** To test which type of host a male preferred, a cafeteria arena having  
262 two concentric circles (outer 9 cm and inner 5 cm diameter) divided into six equal chambers was printed on a white sheet  
263 of paper over which a glass Petri plate (sterilized with ethanol, then with HPLC grade n-hexane and autoclaved) was placed.  
264 Autoclaved distilled water was added along the circumference to prevent males from escaping. This setup was placed on a  
265 wooden platform with a 5-watt LED lamp placed 30 cm above it. Each new male assay, *i.e.*, every data point, was obtained  
266 using a fresh set of six hosts and a fresh Petri plate. Each data point was obtained by randomly choosing a single virgin male  
267 (<48 hours old) from all-male broods to prevent any sensory bias accumulating because of co-development with females.  
268 Each by a video camera (Logitech C615 HD webcam) at 25°C ±1°C. Each male was used only once and then discarded to  
269 prevent prior experience influencing their preference.

270 All parasitized hosts were handled with separate sets of forceps (sterilized with 70% ethanol, HPLC grade *n*-hexane, and  
271 autoclaved). Male preference for either type of hosts (SI – Figure S1) was quantified by the average time spent on each host  
272 for the first 4 minutes. The time spent was counted from when a male climbed onto a host and continued till it dismounted  
273 and abandoned it. All parasitized hosts were cracked open after the experiment to check whether all had the requisite sex,  
274 developmental stage as well as alive or dead wasps. The presence of emerged adult wasps inside was insured by using



275 hosts just one day before emergence, *i.e.*, 13 days for *N. vitripennis* and *N. longicornis*, 14 days for *N. giraulti* and 15 days  
276 for *N. oneida*. Care was taken to note the absence of any emergence holes made by the adult wasps within the hosts. If  
277 not, then the entire data point was discarded from further analysis. A control experiment to check for the males' inherent  
278 directional bias was done using all six unparasitized hosts—none of the four species showing any such directional bias (SI -  
279 Figure S2).

- 280 • **Auditory cues:** To investigate any possible auditory cues coming from the adult wasps, HwAMF were freeze-killed  
281 by keeping them at -80°C for 2 hours, and then brought at room temperature, which was confirmed by an LCD  
282 digital I.R. temperature laser gun (Dual Laser Optical Focus Temperature Gun, NUB8580) and used in the  
283 experiment within 2 hours.
- 284 • **Visual cues:** To check for progressive darkening of the puparial halves serving as a visual cue, the anterior half of  
285 the puparia of the unparasitized hosts of different ages and different degrees of darkening were used (SI - Figure  
286 S3).
- 287 • **Olfactory cues:** To check whether olfactory cues are used, male preference was recorded towards puparial halves  
288 from the anterior part of the parasitized hosts of varying ages (HwAMF and HwL) against those of unparasitized  
289 ones of the same age. Male preference was also tested for the total extract of the puparial halves obtained through  
290 Dichloromethane (DCM) extraction and the non-polar and polar fractions enriched through column  
291 chromatography (see below).  
292 Extracts enriched for cuticular hydrocarbons (CHCs) from both adult male and female wasps were obtained using  
293 the 50 individuals of each, processed through column chromatography, and then used to test the behavioural  
294 response of the males.

295

#### 296 **Column Chromatography Method**

297

298 **a) Chemical extraction of puparial halves:** Puparial halves (n=50) obtained from HwAMF were extracted using 1 ml of HPLC  
299 grade *n*-hexane (Merck Corp.) in a glass vial at room temperature. This extract was poured into a column made of glass  
300 Pasteur pipettes (inner diameter = 0.7 cm) packed with baked glass wool and 3 cm of activated silica gel (100-200 Mesh;  
301 Merck Millipore). The non-polar compounds were eluted in *n*-hexane (3/8 dead volume), followed by the polar compounds'  
302 elution with a Dichloromethane and Methanol solution (9:1). Both the polar and non-polar fractions were concentrated to  
303 50 µl with a Nitrogen stream. Puparial halves obtained from HwAM were extracted through the same protocol and  
304 fractionated to a non-polar fraction.

305

306 **b) Extraction of CHCs from the adult wasps:** 50 individuals were dipped separately in two glass vials with 500 µl of HPLC grade  
307 *n*-hexane (Merck Corp.) 10 minutes. The extract was pipetted out into a fresh set of glass vials. The extract was poured into  
308 a column made out of glass Pasteur pipettes (inner diameter = 0.7 cm) packed with baked glass wool and 1.5 cm of activated

309 silica gel. The non-polar fraction enriched in CHCs was eluted in *n*-hexane (3/8 dead volume) and concentrated to 250  $\mu$ l  
310 under a Nitrogen stream for both males and females separately.  
311 Another set of extraction of adult female CHCs was done through the same protocol and concentrated to 50  $\mu$ l for use as  
312 5X concentrated fraction of CHCs (Figure 7 d).

313  
314 **Gas Chromatography-Mass Spectrometry (GC-MS)**  
315 For identification of the chemicals, the non-polar fraction of the extract obtained from the puparial halves of HwAM, HwAMF  
316 (2  $\mu$ l of each) as well as the extract from 2 individuals each of both adult males and females (separately dipped in 20  $\mu$ l of  
317 Hexane for 10 minutes and concentrated to 2  $\mu$ l under Nitrogen stream), were all separately injected (split-less mode) into a  
318 gas-chromatograph coupled with Mass spectrometer (Agilent 7890B, 5977C GC-MS). The machine had a capillary column,  
319 HP-5MS (Agilent J&W), with an operational mode of electron impact ionization at 70eV (Quadrupole temperature of 150°C).  
320 The inlet temperature and the auxiliary line temperature were maintained at 320°C, and Helium was used as the carrier gas  
321 with an avg. velocity = 36.2 cm/sec. The oven temperature was programmed from 40°C with a hold of 5 minutes, increased  
322 from 40°C to 300°C at 4 °C/min with a final hold for 25 minutes.

323 CHC compounds were identified according to their characteristic diagnostic ions and resulting mass spectra (Lockey, Kenneth  
324 H., 1988; Howard, Ralph W., 1993; Ruther, J. et al., 2011; Carlson, D. A. *et al.*, 1999). The branched-chain alkanes, resulting  
325 from mass fragmentations at branching points, were identified with the extracted ion chromatogram (EIC-*m/z*) and by  
326 comparing the retention index values with the literature data (Steiner, S. *et al.*, 2006; Buellesbach, J. *et al.*, 2018). An *n*-  
327 alkane (C8-C40, SUPELCO) standard was also analyzed under the same conditions to calculate the relative retention indices  
328 to characterize the CHCs (Van Den Dool, H. and P. Dec Kratz, 1963; Carlson, D. A. *et al.*, 1998). Peaks were analyzed in Mass  
329 Hunter Workstation Software vB.08.00 (Agilent Technologies). For calculating the relative abundance of each identified peak,  
330 each was divided by the area of the most abundant peak within each sample (*i.e.*, *n*C-29 in HwAM, *n*C-31 in HwAMF, as well  
331 as adult female and MeC31 (7- ) in adult males). The peak ratios relative to the highest peak (taken as 100 %) were  
332 transformed into percentages for subsequent statistical analysis.

333  
334 **Statistical analysis:**  
335 All statistical analysis was done in RStudio, v1.2.5033 (RStudio Team, 2015). Shapiro-Wilk test (Shapiro, Samuel Sanford, and  
336 Martin B. Wilk., 1965) was used to test for normality using the *stats* package (R Core Team, 2020). The obtained data tested  
337 negative for normality; hence, Wilcoxon signed-rank test (significant at  $p < 0.05$ ) was used to assess male preference in all  
338 the assays. Wilcoxon effect size (*r*) was calculated from the Z-statistic obtained from the Wilcoxon signed-rank test using the  
339 *stats* package. Boxplots were made by using the *ggplot2* package (H. Wickham., 2016). Heatmap was made using the  
340 *pheatmap* (Raivo Kolde., 2019) package in R. Principal Component Analysis was done using the *ggplot* and *ggfortify* (Horikoshi  
341 M. and Li W., 2016; Horikoshi M. and Tang Y., 2018) package in R.

342  
343 **References:**

- 344
- 345 1. Bateman, Angus J., "Intra-sexual selection in *Drosophila*." *Heredity* **2**, no. 3: 349-368 (1948).
- 346 2. Gross, Mart R., "Alternative reproductive strategies and tactics: diversity within sexes." *Trends in Ecology &*  
347 *Evolution* **11**, no. 2: 92-98 (1996).
- 348 3. Kappeler, P. M., "Mate choice," in *Evolution of Primate Societies* (eds. J. C. Mitani *et al.*) 367-386 (Chicago, IL:  
349 University of Chicago Press, 2012).
- 350 4. Muller, M. N., and M. Emery Thompson, "Mating, parenting, and male reproductive strategies." *The evolution of*  
351 *primate societies*, 387-411 (2012).
- 352 5. Andersson, Malte, *Sexual selection*. Vol. **72** (Princeton University Press, 1994).
- 353 6. Godfray, H. Charles J., and H. C. J. Godfray., *Parasitoids: behavioral and evolutionary ecology*. Vol. **67** (Princeton  
354 University Press, 1994).
- 355 7. Fauvergue, Xavier, Keith R. Hopper, and Michael F. Antolin., "Mate finding via a trail sex pheromone by a parasitoid  
356 wasp." *Proceedings of the National Academy of Sciences* **92**, no. 3: 900-904 (1995).
- 357 8. Bernal, Julio S., and Robert F. Luck., "Mate finding via a trail sex pheromone by *Aphytis melinus* DeBach  
358 (Hymenoptera: Aphelinidae) males." *Journal of insect behavior* **20**, no. 6: 515-525 (2007).
- 359 9. Pompanon, Francois, Benoit De Schepper, Yvan Mourer, Pierre Fouillet, and Michel Bouletreau., "Evidence for a  
360 substrate-borne sex pheromone in the parasitoid wasp *Trichogramma brassicae*." *Journal of Chemical Ecology* **23**,  
361 no. 5: 1349-1360 (1997).
- 362 10. Cooper, J. L., and B. H. King., "Substrate-borne marking in the parasitoid wasp *Urolepis rufipes* (Hymenoptera:  
363 Pteromalidae)." *Environmental entomology* **44**, no. 3: 680-688 (2015).
- 364 11. Wittman, T. N., K. A. Miller, and B. H. King., "Finding prospective mates by the parasitoid wasp *Urolepis rufipes*  
365 (Hymenoptera: Pteromalidae)." *Environmental entomology* **45**, no. 6: 1489-1495 (2016).
- 366 12. Vinson, S. Bradleigh., "Host selection by insect parasitoids." *Annual review of entomology* **21**, no. 1: 109-133 (1976).
- 367 13. Hrabar, Michael, Adela Danci, Paul W. Schaefer, and Gerhard Gries., "In the nick of time: males of the parasitoid  
368 wasp *Pimpla disparis* respond to semiochemicals from emerging mates." *Journal of chemical ecology* **38**, no. 3: 253-  
369 261 (2012).
- 370 14. Danci, Adela, Cesar Inducil, Stephen Takács, Paul W. Schaefer, and Gerhard Gries., "Mechanism of mate detection  
371 in parasitoid wasps: sound and vibratory cues change with the developmental progress of future mates inside host  
372 pupal cases." *Physiological Entomology* **39**, no. 4: 292-303. (2014).
- 373 15. Collatz, Jana, Till Tolasch, and Johannes LM Steidle., "Mate finding in the parasitic wasp *Cephalonomia tarsalis*  
374 (Ashmead): more than one way to a female's heart." *Journal of chemical ecology* **35**, no. 7: 761-768 (2009).

- 375 16. Steiner, Sven, Johannes LM Steidle, and Joachim Ruther., 2007. "Host-associated kairomones used for habitat  
376 orientation in the parasitoid *Lariophagus distinguendus* (Hymenoptera: Pteromalidae)." *Journal of stored products*  
377 *research* **43**, no. 4: 587-593.
- 378 17. Mair, Magdalena M., and Joachim Ruther., "Chemical ecology of the parasitoid wasp genus *Nasonia* (Hymenoptera,  
379 Pteromalidae)." *Frontiers in Ecology and Evolution* **7**: 184 (2019).
- 380 18. Raychoudhury, R., Desjardins, C.A., Buellesbach, J., Loehlin, D.W., Grillenberger, B.K., Beukeboom, L., Schmitt, T. and  
381 Werren, J.H., Behavioral and genetic characteristics of a new species of *Nasonia*. *Heredity*, **104(3)**, pp.278-288  
382 (2010).
- 383 19. Whiting, Anna R., "The biology of the parasitic wasp *Mormoniella vitripennis* [= *Nasonia brevicornis*] (Walker)." *The*  
384 *Quarterly Review of Biology* **42**, no. 3: 333-406 (1967).
- 385 20. Cousin, G., "Étude biologique d'un Chalcidien: *Mormoniella vitripennis* Walk." *Bull. Biol. Fr. Belg* **67**: 371-400 (1933).
- 386 21. Werren, John H., "Sex ratio adaptations to local mate competition in a parasitic wasp." *Science* **208**, no. 4448: 1157-  
387 1159 (1980).
- 388 22. Godfray, H. C. J. "Mating systems of parasitoid wasps." *The evolution of mating systems in insects and arachnids*,  
389 211-225 (Cambridge University Press, 1997).
- 390 23. Chirault, Marlène, Louis Van de Zande, Kevin Hidalgo, Claude Chevrier, Christophe Bressac, and Charlotte Lécureuil.,  
391 "The spatio-temporal partitioning of sperm by males of the prospermatogenic parasitoid *Nasonia vitripennis* is in  
392 line with its gregarious lifestyle." *Journal of insect physiology* **91**: 10-17 (2016).
- 393 24. Van den Assem, J., and Vernel, C., Courtship behavior of *Nasonia vitripennis* (Hymenoptera: Pteromalidae):  
394 observations and experiments on male readiness to assume copulatory behavior. *Behavior* **68**, 118 –135 (1979).
- 395 25. Grillenberger, B. K., T. Koevoets, M. N. Burton-Chellew, E. M. Sykes, D. M. Shuker, L. Van de Zande, R. Bijlsma,  
396 Juergen Gadau, and L. W. Beukeboom., 2008. "Genetic structure of natural *Nasonia vitripennis* populations:  
397 validating assumptions of sex-ratio theory." *Molecular ecology* **17**, no. 12: 2854-2864 (2008).
- 398 26. Leonard, Jason E., and Christine R.B. Boake, "Site-dependent aggression and mating behavior in three species of  
399 *Nasonia* (Hymenoptera: Pteromalidae)." *Animal Behaviour* **71**, no. 3: 641-647 (2006).
- 400 27. King, P. E., R. R. Askew, and C. Sanger., "The detection of parasitized hosts by males of *Nasonia vitripennis* (Walker)  
401 (Hymenoptera: Pteromalidae) and some possible implications." In *Proceedings of the Royal Entomological Society*  
402 *of London. Series A, General Entomology*, vol. **44**, no. 7-9, pp. 85-90 (Oxford, U.K.: Blackwell Publishing Ltd., 1969).
- 403 28. Sinha, Shuvra Kanti, and Santanu Mahato., "Intra-puparial development of flesh fly *Sarcophaga dux* (Thomson)  
404 (Diptera, Sarcophagidae)." *Current Science*: 1063-1070 (2016).
- 405 29. Van den Assem, J., F. Jachmann, and Pina Simbolotti., "Courtship behavior of *Nasonia vitripennis* (Hym.  
406 Pteromalidae): some qualitative, experimental evidence for the role of pheromones." *Behaviour*: 301-307 (1980).

- 407 30. Ruther, Joachim, Michael Matschke, Leif-Alexander Garbe, and Sven Steiner, "Quantity matters: male sex  
408 pheromone signals mate quality in the parasitic wasp *Nasonia vitripennis*." *Proceedings of the Royal Society B:  
409 Biological Sciences* **276**, no. 1671: 3303-3310 (2009).
- 410 31. Ruther, Joachim, Kathleen Thal, and Sven Steiner., "Pheromone communication in *Nasonia vitripennis*: abdominal  
411 sex attractant mediates site fidelity of releasing males." *Journal of chemical ecology* **37**, no. 2: 161-165 (2011).
- 412 32. Mair, Magdalena M., Violeta Kmezic, Stephanie Huber, Bart A. Pannebakker, and Joachim Ruther., "The chemical  
413 basis of mate recognition in two parasitoid wasp species of the genus *Nasonia*." *Entomologia Experimentalis et  
414 Applicata* **164**, no. 1: 1-15 (2017).
- 415 33. Buellesbach, Jan, Jürgen Gadau, Leo W. Beukeboom, Felix Echinger, Rhitoban Raychoudhury, John H. Werren, and  
416 Thomas Schmitt., "Cuticular hydrocarbon divergence in the jewel wasp *Nasonia*: evolutionary shifts in chemical  
417 communication channels?" *Journal of evolutionary biology* **26**, no. 11: 2467-2478 (2013).
- 418 34. Buellesbach, Jan, Sebastian G. Vetter, and Thomas Schmitt., "Differences in the reliance on cuticular hydrocarbons  
419 as sexual signaling and species discrimination cues in parasitoid wasps." *Frontiers in zoology* **15**, no. 1: 1-11 (2018).
- 420 35. Blaul, Birgit, Robert Steinbauer, Philipp Merkl, Rainer Merkl, Herbert Tschochner, and Joachim Ruther., "Oleic acid  
421 is a precursor of linoleic acid and the male sex pheromone in *Nasonia vitripennis*." *Insect biochemistry and molecular  
422 biology* **51**: 33-40 (2014).
- 423 36. King, P. E., and Jamal Rafai, "Host discrimination in a gregarious parasitoid *Nasonia vitripennis* (Walker)  
424 (Hymenoptera: Pteromalidae)." *Journal of experimental Biology* **53**, no. 1: 245-254 (1970).
- 425 37. Yoder, Jay A., and David L. Denlinger., "Water balance in flesh fly pupae and water vapour absorption associated  
426 with diapause." *Journal of Experimental Biology* **157**, no. 1: 273-286 (1991).
- 427 38. Carlson, D. A., C. J. Geden, and U. R. Bernier., "Identification of pupal exuviae of *Nasonia vitripennis* and  
428 *Muscidifurax raptorellus* parasitoids using cuticular hydrocarbons." *Biological Control* **15**, no. 2: 97-106 (1999).
- 429 39. Carlson, David A., Ulrich R. Bernier, and Bruce D. Sutton., "Elution patterns from capillary G.C. for methyl-branched  
430 alkanes." *Journal of Chemical Ecology* **24**, no. 11: 1845-1865 (1998).
- 431 40. Steiner, Sven, Nadin Hermann, and Joachim Ruther., "Characterization of a female-produced courtship pheromone  
432 in the parasitoid *Nasonia vitripennis*." *Journal of chemical ecology* **32**, no. 8: 1687-1702 (2006).
- 433 41. Giesbers, M. C. W. G., B. A. Pannebakker, L. van de Zande, and L. Beukeboom., "Within-host mating in the *Nasonia*  
434 genus is largely dependent on male behavior." *MCWG Giesbers, Genetics of Reproductive Behaviour in Nasonia*: 89-  
435 110 (2016).
- 436 42. Steiner, Sven, Johannes LM Steidle, and Joachim Ruther., "Female sex pheromone in immature insect males—a case  
437 of pre-emergence chemical mimicry?" *Behavioral Ecology and Sociobiology* **58**, no. 2: 111-120 (2005).
- 438 43. Mair, Magdalena M., and Joachim Ruther., "Territoriality and behavioral strategies at the natal host patch differ in  
439 two microsympatric *Nasonia* species." *Animal Behaviour* **143**: 113-129 (2018).

- 440 44. Heraty, John M., Roger A. Burks, Astrid Cruaud, Gary AP Gibson, Johan Liljeblad, James Munro, Jean-Yves Rasplus,  
441 et al., "A phylogenetic analysis of the megadiverse Chalcidoidea (Hymenoptera)." *Cladistics* **29**, no. 5: 466-542  
442 (2013).
- 443 45. Lockey, Kenneth H., 1988. "Lipids of the insect cuticle: origin, composition and function." *Comparative Biochemistry*  
444 *and Physiology Part B: Comparative Biochemistry* 89, no. 4: 595-645.
- 445 46. Howard, Ralph W., 1993. "Cuticular hydrocarbons and chemical communication." *Insect lipids: chemistry,*  
446 *biochemistry and biology*: 179-226.
- 447 47. Ruther, Joachim, Kathleen Thal, and Sven Steiner., 2011. "Pheromone communication in *Nasonia vitripennis*:  
448 abdominal sex attractant mediates site fidelity of releasing males." *Journal of chemical ecology* 37, no. 2: 161-165.
- 449 48. Carlson, D. A., C. J. Geden, and U. R. Bernier., 1999. "Identification of pupal exuviae of *Nasonia vitripennis* and  
450 *Muscidifurax raptorellus* parasitoids using cuticular hydrocarbons." *Biological Control* 15, no. 2: 97-106.
- 451 49. Steiner, Sven, Nadin Hermann, and Joachim Ruther., 2006. "Characterization of a female-produced courtship  
452 pheromone in the parasitoid *Nasonia vitripennis*." *Journal of chemical ecology* 32, no. 8: 1687-1702.
- 453 50. Buellbach, Jan, Sebastian G. Vetter, and Thomas Schmitt., 2018 "Differences in the reliance on cuticular  
454 hydrocarbons as sexual signaling and species discrimination cues in parasitoid wasps." *Frontiers in zoology* 15, no.  
455 1: 1-11.
- 456 51. Van Den Dool, H. and P. Dec Kratz, 1963. A generalization of the retention index system including linear temperature  
457 programmed gas-liquid partition chromatography. No. RESEARCH.
- 458 52. Carlson, David A., Ulrich R. Bernier, and Bruce D. Sutton., 1998. "Elution patterns from capillary GC for methyl-  
459 branched alkanes." *Journal of Chemical Ecology* 24, no. 11: 1845-1865.
- 460 53. RStudio Team, 2015. RStudio: Integrated Development for R. RStudio, Inc., Boston, MA, USA, 2015.
- 461 54. Shapiro, Samuel Sanford, and Martin B. Wilk., 1965. "An analysis of variance test for normality (complete samples)."  
462 *Biometrika* 52, no. 3/4: 591-611.
- 463 55. R Core Team, 2020. R: A language and environment for statistical computing. R Foundation for Statistical  
464 Computing, Vienna, Austria, URL <https://www.R-project.org/>.
- 465 56. H. Wickham., 2016. *ggplot2: Elegant Graphics for Data Analysis*. Springer-Verlag New York.
- 466 57. Raivo Kolde., 2019. *heatmap: Pretty Heatmaps*. R package version 1.0.12.
- 467 58. Horikoshi M, Li W., 2016. "ggfortify: Unified Interface to Visualize Statistical Result of Popular R Packages". *The R*  
468 *Journal*, 8. <https://journal.r-project.org/>.
- 469 59. Horikoshi M, Tang Y., 2018. *ggfortify: Data Visualization Tools for Statistical Analysis Results*. [https://CRAN.R-](https://CRAN.R-project.org/package=ggfortify)  
470 [project.org/package=ggfortify](https://CRAN.R-project.org/package=ggfortify).
- 471

472 **Acknowledgments:**

473 We thank Ruchira Sen and all Evogen lab members for comments on the study and Leo Beukeboom (University of  
474 Groningen) for providing us with strains of the four *Nasonia* species.

475  
476 **Author contributions:** GP conceived the study, designed the experiments, collected data and analysed the results. AY and  
477 GP performed the GC-MS. AA supervised the GC-MS. AS helped with data collection. GP and RR wrote the manuscript.

478  
479 **Funding:** This work was supported by the financial support of the Indian Institute of Science Education and Research (IISER),  
480 Mohali, India, and Council of Scientific and Industrial Research, Government of India, for providing Junior and Senior  
481 Research Fellowship (09/947(0079)/2016-EMR-I) to G.P.

482  
483 **Data availability:** All behavioral assays are available as videos on  
484 <https://www.youtube.com/channel/UCBh3wyHrAty7dvcLNX6HeOw/videos>.

485  
486 **Declarations of interests:** The authors declare no competing interests.

487  
488  
489  
490  
491  
492  
493  
494  
495  
496  
497  
498  
499  
500  
501  
502  
503  
504  
505  
506

507 **Figures and Legends for**

508

509 **The males of the parasitoid wasp, *Nasonia vitripennis*, can identify which fly hosts contain females.**

510

511

512

513 <sup>1</sup>Garima Prazapati, <sup>2</sup>Ankit Yadav, <sup>2</sup>Anoop Ambili, <sup>1</sup>Abhilasha Sharma, <sup>1\*</sup>Rhitoban Raychoudhury

514

515

516 <sup>1</sup>Department of Biological Sciences, Indian Institute of Science Education and Research (IISER) Mohali, Knowledge City,

517 Sector- 81, Manauli P.O. 140306, India

518 <sup>2</sup>Department of Earth and Environmental Sciences, Indian Institute of Science Education and Research (IISER) Mohali,

519 Knowledge City, Sector- 81, Manauli P.O. 140306, India

520

521 \*Correspondence: [rhitoban@iisermohali.ac.in](mailto:rhitoban@iisermohali.ac.in)

522

523

524 **This file includes:**

525 Figures 1 to 8

526 Table 1

527 Legends for figures 1 to 8

528 Legend for Table 1

529

530

531

532

533

534

535

536



## *Nasonia* males can detect parasitized hosts

537

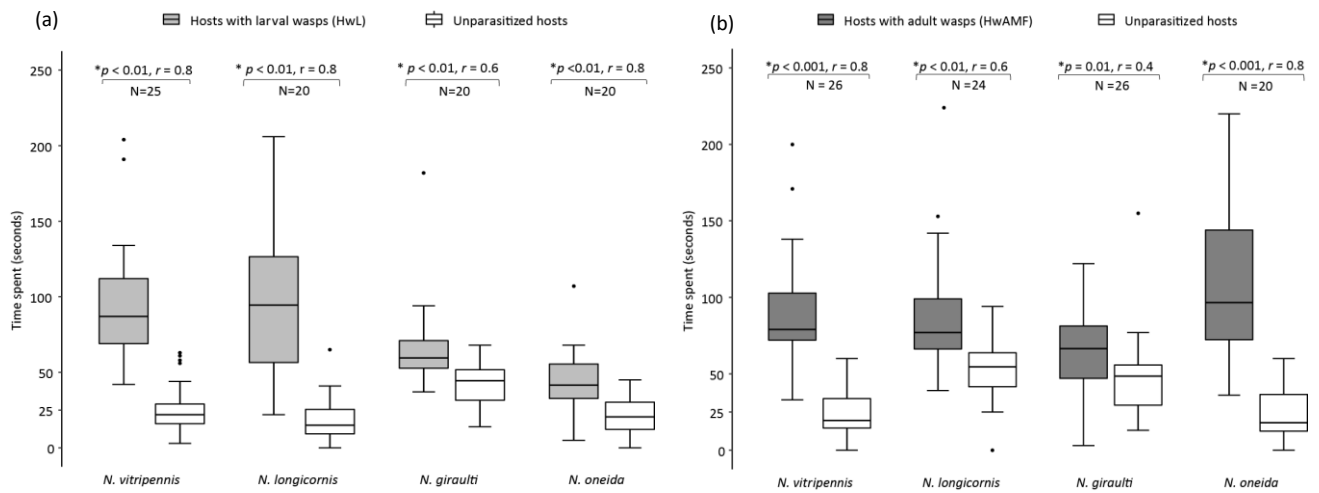

538

539

540 **Figure 1: *Nasonia* males can detect parasitized hosts: (a)** Average time spent by males of all the four species, on parasitized  
541 hosts containing larval wasps (HwL) versus unparasitized ones. Males of all the four species spend significantly more time  
542 on parasitized hosts indicating their ability to detect hosts with larval wasps inside. **(b)** Average time spent by males on  
543 parasitized hosts containing adult wasps (HwAMF) and unparasitized ones. Males of all the four species spend significantly  
544 more time on parasitized hosts indicating their preference for hosts with adult wasps inside.

545 The numbers above the boxes represent the  $p$ -value and the sample size (N) for each species. In boxplots, the horizontal  
546 bold line represents the median, boxes represent 25% and 75% quartiles, whiskers denote 1.5 interquartile ranges and  
547 black dots depict outliers. Statistical significance levels shown are according to Wilcoxon signed-rank test (statistically  
548 significant at  $p < 0.05$ ) with (\*) denoting a significant  $p$ -value. Wilcoxon effect size ( $r$ ) values range from  $r = 0.1 - < 0.3$  (small  
549 effect),  $r = 0.3 - < 0.5$  (moderate effect) and  $r \geq 0.5$  (large effect). Species names are given at the bottom.

550

551

552

553

554

555

556

557

558

559

560

## *N. vitripennis* males can detect adult females within hosts

561

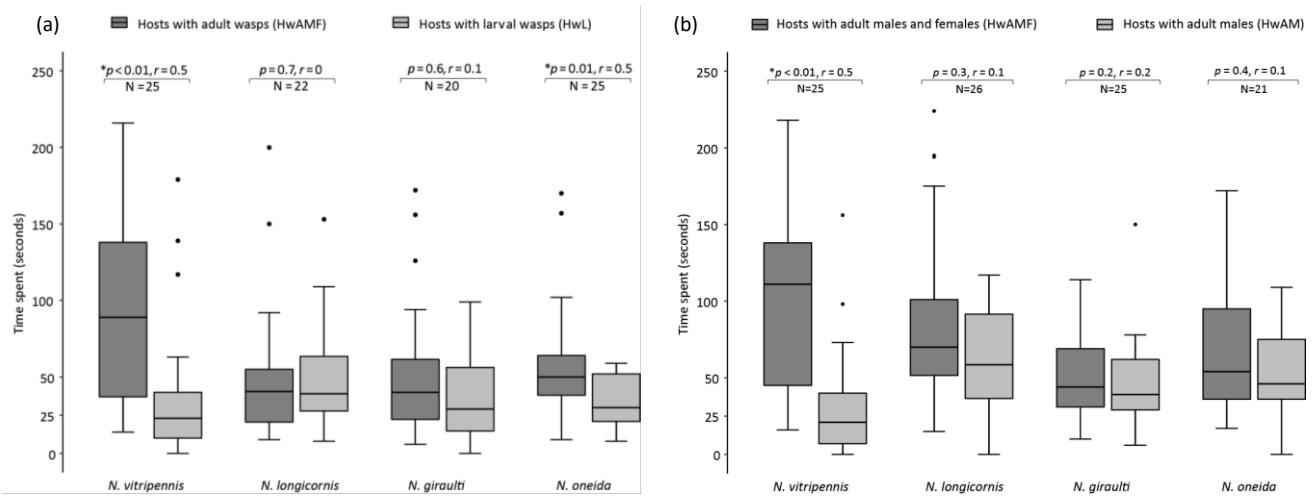

562

563

564 **Figure 2: *N. vitripennis* males can detect adult females within hosts: (a)** Average time spent by males of all the four species  
 565 on parasitized hosts containing adult wasps (HwAMF) and those containing larval wasps (HwL). Males of *N. vitripennis* and  
 566 *N. oneida* can distinguish between HwAMF over HwL, whereas, *N. longicornis* and *N. giraulti* cannot. **(b)** *N. vitripennis* males  
 567 can distinguish between hosts with males and females (HwAMF) over those containing all - male broods (HwAM). *N.*  
 568 *longicornis*, *N. giraulti* and *N. oneida* do not show this capability. Thus, *N. vitripennis* males can detect adult females still  
 569 inside the hosts.

570 The numbers above the boxes represent the *p*-value and the sample size (N) for each species. In boxplots, the horizontal  
 571 bold line represents the median, boxes represent 25% and 75% quartiles, whiskers denote 1.5 interquartile ranges and  
 572 black dots depict outliers. Statistical significance levels shown are according to Wilcoxon signed-rank test (statistically  
 573 significant at *p* < 0.05) with (\*) denoting a significant *p*-value. Wilcoxon effect size (*r*) values range from *r* = 0.1 - < 0.3 (small  
 574 effect), *r* = 0.3 - < 0.5 (moderate effect) and *r* >= 0.5 (large effect). Species names are given at the bottom.

575

576

577

578

579

580

581

582

583

584

## *N. vitripennis* males do not utilize auditory and visual cues to detect adult females within hosts

585

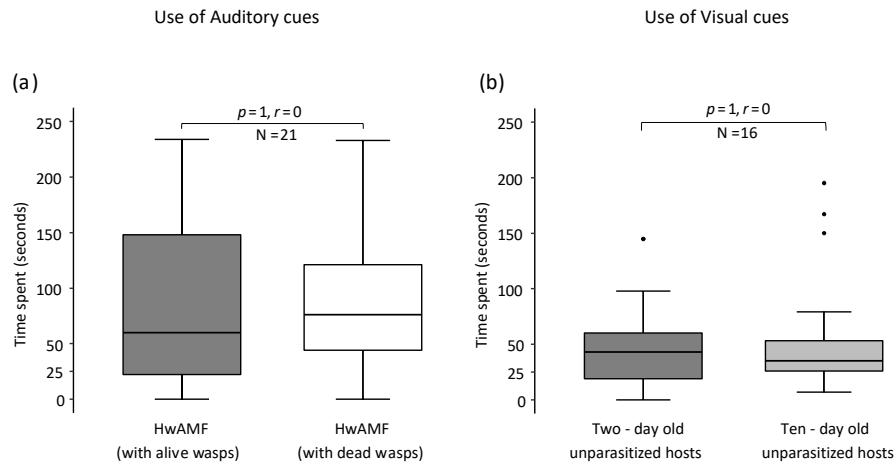

586

587

588

589

590

591

592

593

594

595

596

597

598

599

600

601

602

603

604

605

606

607

608

**Figure 3: *N. vitripennis* do not utilize auditory and visual cues to detect adult females within hosts:** (a) No significant difference was found between average time spent by males on HwAMF with alive wasps and those with dead wasps. Hence, males do not utilize auditory cues. (b) No significant difference was found between average time spent by males on the puparial halves of two - day old and ten - day old unparasitized hosts. Hence, males do not utilize visual cues. The numbers above the boxes represent the  $p$ -value and the sample size ( $N$ ), respectively. In boxplots, the horizontal bold line represents the median, boxes represent 25% and 75% quartiles and whiskers denote 1.5 interquartile ranges and black dots depict outliers. Statistical significance levels shown are according to Wilcoxon signed-rank test (statistically significant at  $p < 0.05$ ) with (\*) denoting a significant  $p$ -value. Wilcoxon effect size ( $r$ ) values range from  $r = 0.1 - < 0.3$  (small effect),  $r = 0.3 - < 0.5$  (moderate effect) and  $r \geq 0.5$  (large effect).

## *N. vitripennis* males utilize olfactory cues to detect adult females within hosts

609  
610

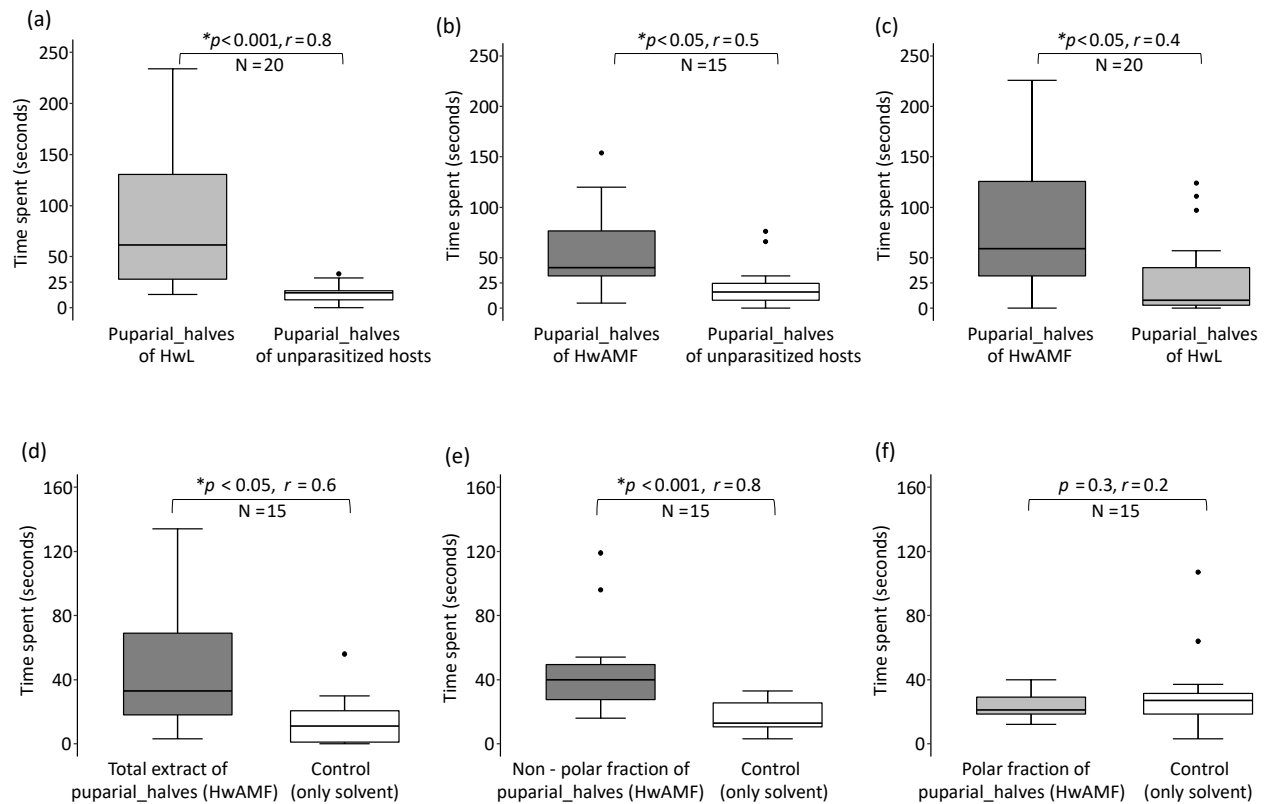

611  
612

613 **Figure 4: *N. vitripennis* males utilize olfactory cues to detect adult females within hosts:** (a) Males prefer parasitized  
614 puparial halves of HwL (hosts containing larval wasps) over those of hosts containing fly pupa. (b) Males prefer puparial  
615 halves of HwAMF (hosts containing adult wasps) over unparasitized hosts. (c) Average time spent by the males on puparial  
616 halves of HwAMF versus HwL. Males spend significantly more time on the former. (d) Average time spent by males on the  
617 total extract of puparial halves of HwAMF versus the control poured with the solvent (DCM). Males prefer the extract,  
618 indicating that they utilize olfactory cues. (e) Average time spent by males on the non-polar fraction of the extract (enriched  
619 for CHCs) versus control. Males show significant preference for the non-polar fraction. (f) Average time spent by males on  
620 the polar fraction of the extract versus control. Males show no preference towards either. Thus, the nature of olfactory  
621 cues utilized by the *N. vitripennis* males is non-polar, usually enriched for CHCs

622 The numbers above the boxes represent the  $p$ -value and the sample size (N), respectively. In boxplots, the horizontal bold  
623 line represents the median, boxes represent 25% and 75% quartiles and whiskers denote 1.5 interquartile ranges and black  
624 dots depict outliers. Statistical significance levels shown are according to Wilcoxon signed-rank test (statistically significant  
625 at  $p < 0.05$ ) with (\*) denoting a significant  $p$ -value. Wilcoxon effect size ( $r$ ) values range from  $r = 0.1 - < 0.3$  (small effect),  $r$   
626  $= 0.3 - < 0.5$  (moderate effect) and  $r \geq 0.5$  (large effect).

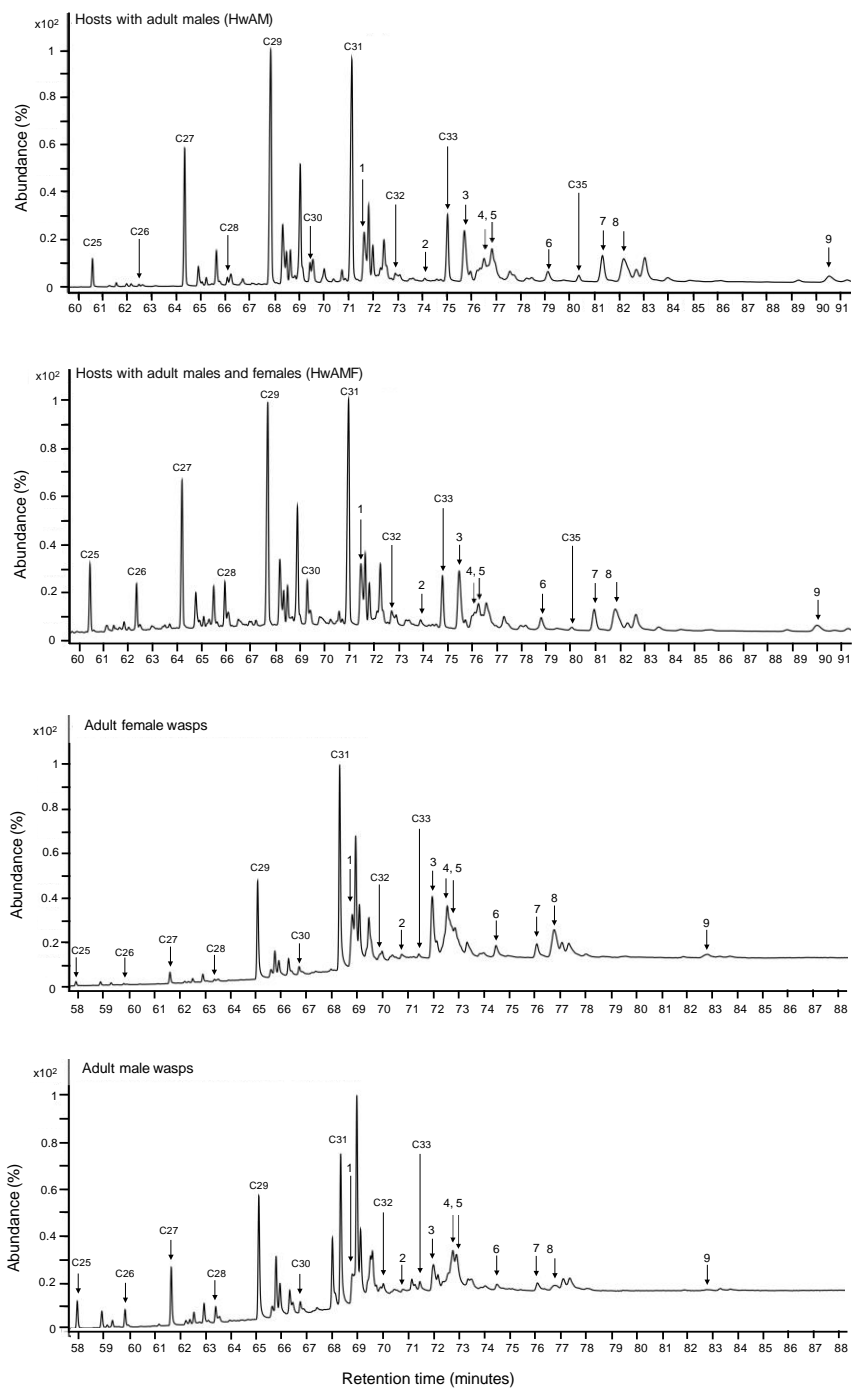

627

628

629

630

631

632

633

**Figure 5: GC-MS profile obtained of different samples:** Peak chromatogram of the non-polar fractions (enriched for CHCs) from HwAMF and HwAM shown in reference to the CHC profiles of adult male and female wasps. All the four samples share the same 47 CHC compounds (see also S.I., Table - S1). Straight chain alkanes (*n*C25- *n*C35) and nine compounds present in higher abundance in HwAMF and adult females (see also Table 1), are labelled (1-9) to their corresponding peaks.

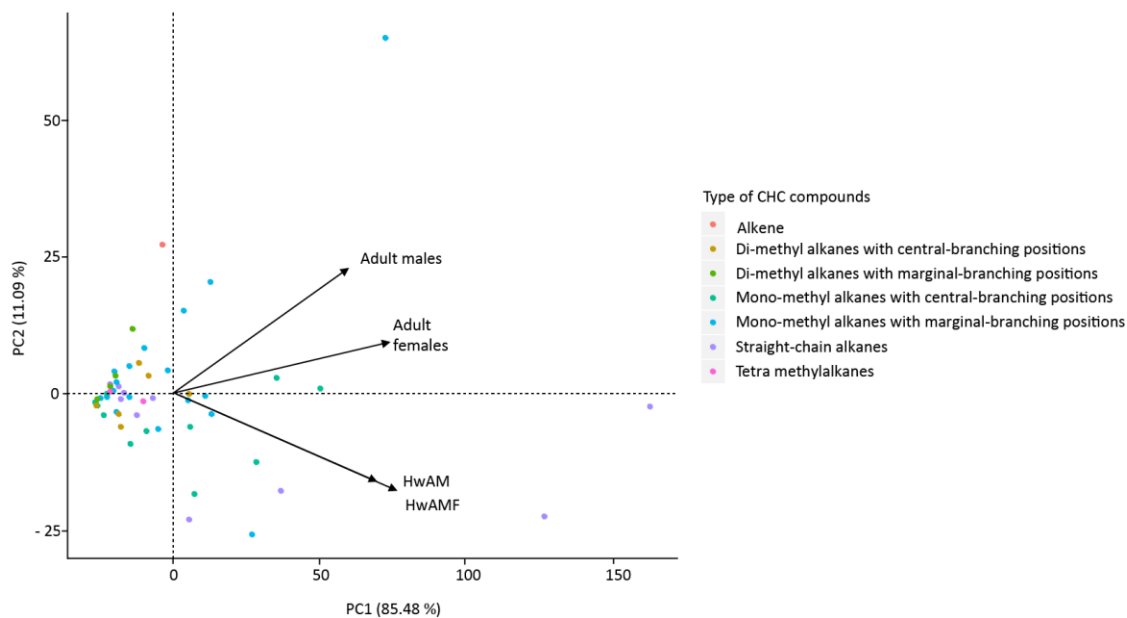

634

635

636 **Figure 6: Principal component analysis of the cuticular hydrocarbon (CHC) profiles of different samples:** A two-  
637 dimensional biplot of the principal component 1 and 2 explains 96.57% of the variance in the data. The samples HwAMF  
638 and HwAM show no separation unlike the adult males and females' profiles.

639

640

641

642

643

644

645

646

647

648

649

650

651

652

653

654

655

656

*N. vitripennis* males utilize cuticular hydrocarbons (CHCs) of females as olfactory cues to detect adult females within hosts

657

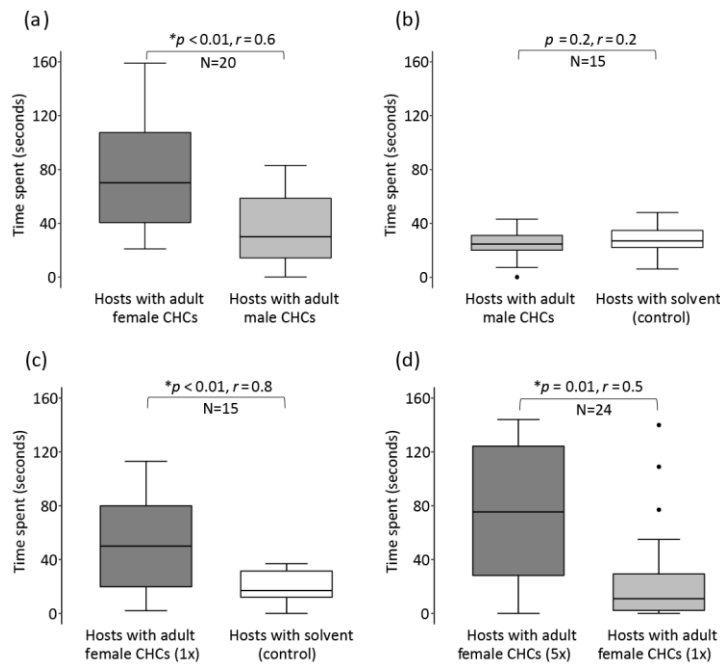

658

659

660 **Figure 7: *N. vitripennis* males utilize cuticular hydrocarbons (CHCs) of females as olfactory cues to detect adult females**  
661 **within hosts: (a)** Average time spent by males on the hosts poured over with female CHCs versus those with male CHCs.  
662 Males prefer the hosts poured over with adult female CHCs. **(b)** Average time spent by males on the hosts poured over with  
663 male CHCs versus the control poured with the solvent (Hexane). Males do not distinguish between the two types of hosts.  
664 Thus, males utilize female CHCs for detecting hosts with adult females inside. **(c)** Average time spent by males on the hosts  
665 poured over with female CHCs at 1x concentration versus control (Hexane). Males prefer the hosts poured over with female  
666 CHCs. **(d)** Average time spent by males on the hosts poured over with female CHCs at 1x concentration versus 5x  
667 concentration. Males prefer the hosts poured over with a higher concentration (5x) of adult female CHCs.

668 The numbers above the boxes represent the p-value and the sample size (N), respectively. In boxplots, the horizontal bold  
669 line represents the median, boxes represent 25% and 75% quartiles and whiskers denote 1.5 interquartile ranges and black  
670 dots depict outliers. Statistical significance levels shown are according to Wilcoxon signed-rank test (statistically significant  
671 at  $p < 0.05$ ) with (\*) denoting a significant p-value. Wilcoxon effect size (r) values range from  $r = 0.1 - < 0.3$  (small effect),  $r =$   
672  $0.3 - < 0.5$  (moderate effect) and  $r \geq 0.5$  (large effect).

673

674

675

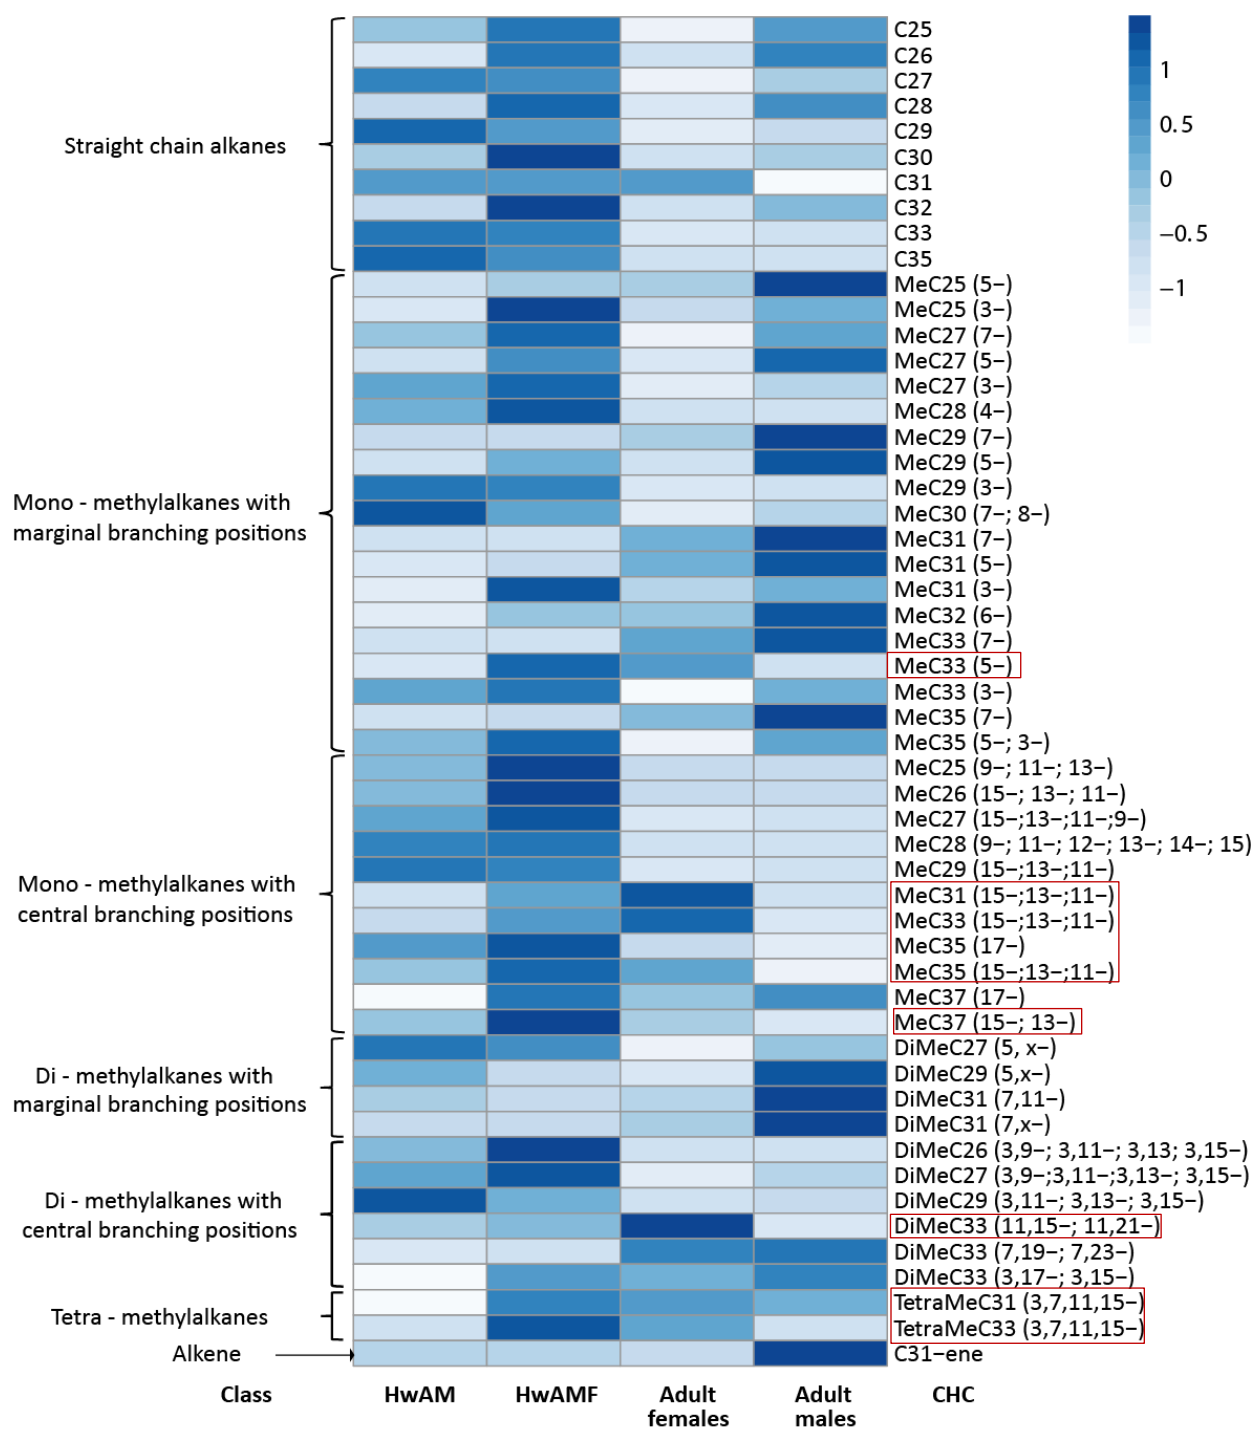

676  
 677  
 678 **Figure 8: Heat map of CHCs:** The heat map shows the abundance of various CHC compounds (scaled to the color intensity)  
 679 in different samples. Names of the compounds are given on the right, the class they belong to is given on the left and  
 680 sample names are given below. Compounds inside the red boxes have higher relative abundances (positive Cohen's d,  
 681 from Table 1) in HwAMF.  
 682



683 **Table 1: List of candidate CHCs:** Nine CHC compounds were found to have a higher (Cohen's *d*) relative abundance in the  
 684 adult females than in males, similar to that found in HwAMF over HwAM. The major class of compounds are the mono-  
 685 methyl alkanes (with central-branching positions), Di- and Tetra- methyl alkanes with the carbon chain length > 30. (For a  
 686 full list of identified CHCs, see S.I. - Table S1).  
 687

| S.No. | Compound name           | Class                                                     | Effect size (Cohen's <i>d</i> ) |                                 |
|-------|-------------------------|-----------------------------------------------------------|---------------------------------|---------------------------------|
|       |                         |                                                           | Between HwAMF and HwAM          | Between Adult females and males |
| 1     | MeC33 (5-)              | Monomethylalkanes (with central-branching positions) >C30 | 1.83                            | 1.91                            |
| 2     | MeC31 (15-;13-;11-)     |                                                           | 3.98                            | 6.52                            |
| 3     | MeC33 (15-;13-;11-)     |                                                           | 2.60                            | 2.52                            |
| 4     | MeC35 (17-)             |                                                           | 0.95                            | 0.49                            |
| 5     | MeC35 (15-;13-;11-)     |                                                           | 1.87                            | 2.81                            |
| 6     | MeC37 (15-;13-)         |                                                           | 1.77                            | 3.39                            |
| 7     | DiMeC33 (11,15-;11,21-) | Dimethylalkane (with central-branching positions) >C30    | 2.20                            | 3.62                            |
| 8     | TetraMeC31 (3,7,11,15-) | Tetramethylalkanes                                        | 7.90                            | 0.31                            |
| 9     | TetraMeC33 (3,7,11,15-) |                                                           | 3.05                            | 1.11                            |

688
