# Supplementary material for: The males of the parasitoid wasp, Nasonia vitripennis, can identify which fly hosts contain females
Source: bioRxiv or medRxiv preprint supplement (doi:10.1101/2021.04.06.438549), 2021-04-18
Supplement: Supplementary file [file media-1.pdf]

## Supplementary Information (SI)

### 1 **Supplementary Information for**

2

### 3 **The males of the parasitoid wasp, *Nasonia vitripennis*, can identify which fly hosts contain females.**

4

5

6

7 <sup>1</sup>Garima Prazapati, <sup>2</sup>Ankit Yadav, <sup>2</sup>Anoop Ambili, <sup>1</sup>Abhilasha Sharma, <sup>1\*</sup>Rhitoban Raychoudhury

8

9

10 <sup>1</sup>Department of Biological Sciences, Indian Institute of Science Education and Research (IISER) Mohali, Knowledge City,  
11 Sector- 81, Manauli P.O. 140306, India

12 <sup>2</sup>Department of Earth and Environmental Sciences, Indian Institute of Science Education and Research (IISER) Mohali,  
13 Knowledge City, Sector- 81, Manauli P.O. 140306, India

14

15 \*Correspondence: [rhitoban@iisermohali.ac.in](mailto:rhitoban@iisermohali.ac.in)

16

17

### 18 **This file includes:**

19

20 Figures S1 to S3

21 Table S1

22 Legends for figures S1 to S3

23 Legend for Table S1

24

25

26

27

28

29

30

31

32

33

34

35

## Supplementary Information (SI)

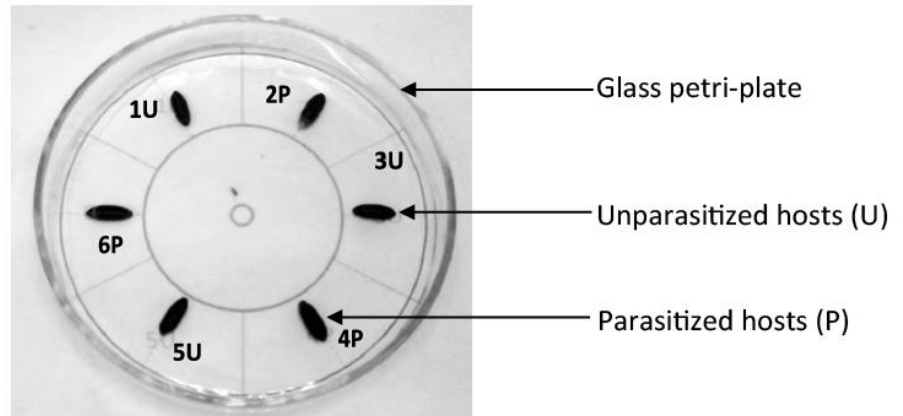

36  
37

38 **Figure S1. Cafeteria arena used for all the behavioural assays:** The arena had two concentric circles (the outer 9 cm  
39 and the inner 5 cm diameter, respectively) divided into six equal chambers printed on a white sheet of paper over which  
40 a glass Petri plate (sterilized with ethanol, then with HPLC grade n-hexane and autoclaved) was placed. Autoclaved  
41 distilled water was added along the circumference to prevent males from escaping. This setup was placed on a wooden  
42 platform with a 5-watt LED lamp placed 30 cm above it. Each male was dropped at the centre of this arena, and the  
43 behaviour was recorded for 4 minutes by a video camera (Logitech C615 HD webcam) at  $25^{\circ}\text{C} \pm 1^{\circ}\text{C}$ .

44  
45  
46  
47  
48  
49  
50

## Supplementary Information (SI)

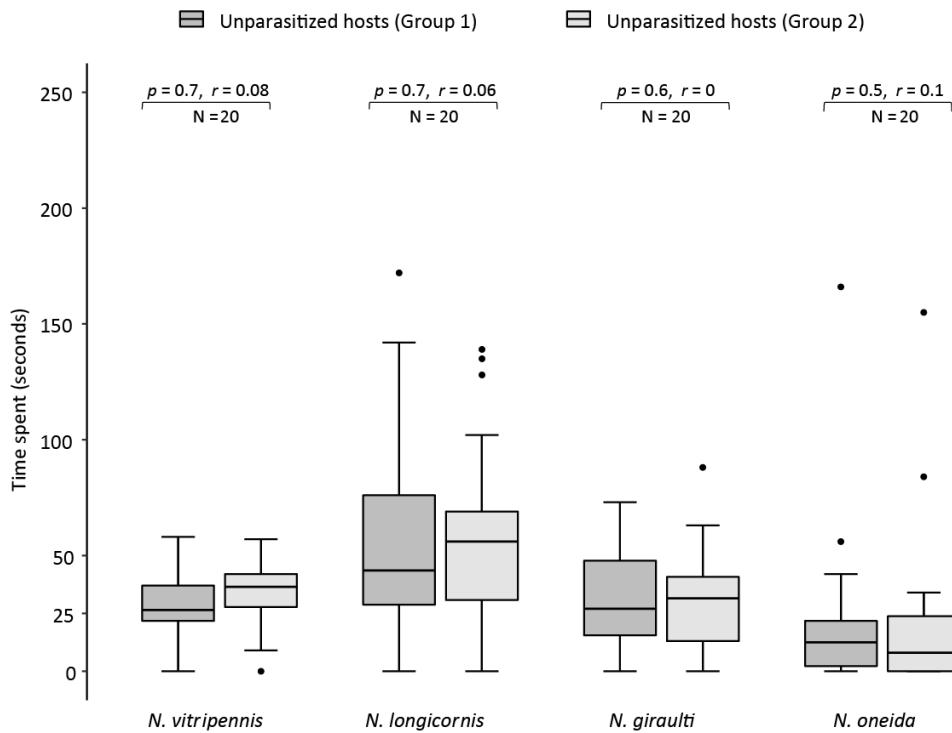

51  
52

53 **Figure S2. No inherent directional bias of male *Nasonia* in the cafeteria arena:** To check whether *Nasonia* have an  
54 inherent bias towards any one direction within the arena, males were given a choice between six hosts (all  
55 unparasitized) and scored for time spent on each. These six unparasitized hosts were randomly divided into 2 groups  
56 of three each, to mimic the actual choice assay (as in figure S1), with the help of random numbers assigned to each  
57 (from 0 to 1). Random numbers with the lowest three values for each assay (N = 20) were assigned to “group 1” and  
58 the remaining to “group 2”. Wilcoxon- signed-rank test was performed for assessing the difference in distribution of  
59 the two groups of unparasitized hosts. As the figure above indicates, no significant difference was found for the two  
60 groups across all the four species, indicating no evidence of a directional bias.

61 The numbers above the boxes represent the *p*-value and the sample size (N) for each species. In boxplots, the  
62 horizontal bold line within each box represents the median, boxes represent 25% and 75% quartiles, whiskers denote  
63 1.5 interquartile ranges and black dots depict outliers. Statistical significance levels shown are according to Wilcoxon  
64 signed-rank test (statistically significant at *p* < 0.05) with (\*) denoting a significant *p*-value. Wilcoxon effect size (*r*)  
65 values range from *r* = 0.1 - < 0.3 (small effect), *r* = 0.3 - < 0.5 (moderate effect) and *r* >= 0.5 (large effect). Species  
66 names are given at the bottom.

67  
68

## Supplementary Information (SI)

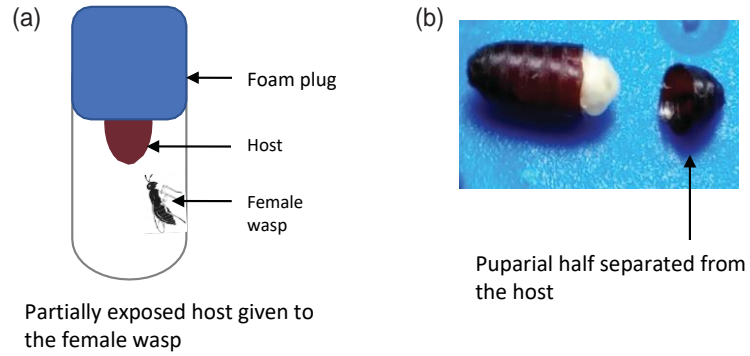

69  
70  
71 **Figure S3. Use of puparial halves for the assays:** A) Individual unparasitized host was half embedded in foam plugs  
72 put in vials so that only a part (anterior part) of the host was accessible to the female for parasitization. Half of such  
73 vials were exposed to individual mated female wasps while others remained female free, hence, unparasitized. B)  
74 After 48 hours, the hosts were taken out from plugs, carefully cracked open from the anterior part and the puparium  
75 separated from it. The hosts that were exposed to mated females were checked for the presence of eggs (now  
76 localized at the head of the fly pupa), and those found without eggs were discarded. The puparia of HwAMF and hosts  
77 containing adult fly (ten-day old) were collected after confirming the presence of adult wasps and adult fly,  
78 respectively.

79  
80  
81  
82  
83  
84  
85  
86  
87  
88  
89  
90  
91  
92  
93  
94  
95  
96  
97  
98  
99

Supplementary Information (SI)

100 **Table - S1: List of all identified CHC compounds:** There are 53 identified CHCs in HwAMF and HwAM and 47 in adult males  
 101 and females (N = 4 for each sample). Each value represents mean relative abundance ( $\pm$  SEM or standard error of mean)  
 102 expressed as a percentage. Retention times mentioned are of the samples HwAMF and HwAM (for chromatograms see figure  
 103 5).

| S.No. | Retention Time | Linear Retention Index | Compound name                      | Mean relative abundance (%) $\pm$ SEM |                  |                  |                  |
|-------|----------------|------------------------|------------------------------------|---------------------------------------|------------------|------------------|------------------|
|       |                |                        |                                    | HwAM                                  | HwAMF            | Adult male       | Adult female     |
| 1     | 60.6           | 2500                   | C25                                | 9.40 $\pm$ 0.58                       | 14.88 $\pm$ 2.27 | 4.35 $\pm$ 0.35  | 12.72 $\pm$ 0.25 |
| 2     | 61.1           | 2534                   | MeC25 (9-; 11-; 13-)               | 0.73 $\pm$ 0.19                       | 2.57 $\pm$ 0.15  | -                | -                |
| 3     | 61.6           | 3041                   | MeC25 (5-)                         | 1.72 $\pm$ 0.30                       | 3.04 $\pm$ 0.41  | 2.96 $\pm$ 0.26  | 8.08 $\pm$ 0.26  |
| 4     | 62             | 3141                   | MeC25 (3-)                         | 1.29 $\pm$ 0.26                       | 4.65 $\pm$ 0.29  | 1.70 $\pm$ 0.17  | 2.89 $\pm$ 0.09  |
| 5     | 62.5           | 2600                   | C26                                | 0.87 $\pm$ 0.17                       | 8.76 $\pm$ 2.07  | 0.91 $\pm$ 0.08  | 7.89 $\pm$ 0.12  |
| 6     | 62.66          | 3355                   | DiMeC26 (3,9-; 3,11-; 3,13; 3,15-) | 0.87 $\pm$ 0.18                       | 2.35 $\pm$ 0.05  | -                | -                |
| 7     | 63.15          | 2635                   | MeC26 (15-; 13-; 11-)              | 0.54 $\pm$ 0.09                       | 1.70 $\pm$ 0.17  | -                | -                |
| 8     | 64.4           | 2700                   | C27                                | 46.42 $\pm$ 0.51                      | 43.62 $\pm$ 3.14 | 8.83 $\pm$ 0.59  | 27.30 $\pm$ 0.63 |
| 9     | 64.9           | 2735                   | MeC27 (15-;13-;11-;9-)             | 8.61 $\pm$ 0.73                       | 14.05 $\pm$ 0.21 | 0.82 $\pm$ 0.06  | 1.69 $\pm$ 0.16  |
| 10    | 65.07          | 3149                   | MeC27 (7-)                         | 1.36 $\pm$ 0.11                       | 2.32 $\pm$ 0.10  | 0.67 $\pm$ 0.08  | 1.74 $\pm$ 0.05  |
| 11    | 65.25          | 3173                   | MeC27 (5-)                         | 2.82 $\pm$ 0.29                       | 4.48 $\pm$ 0.33  | 2.59 $\pm$ 0.16  | 5.04 $\pm$ 0.06  |
| 12    | 65.66          | 3244                   | MeC27 (3-)                         | 13.15 $\pm$ 0.70                      | 17.55 $\pm$ 0.94 | 4.84 $\pm$ 0.37  | 8.75 $\pm$ 0.20  |
| 13    | 65.8           | 2785                   | DiMeC27 (5, x-)                    | 1.28 $\pm$ 0.06                       | 1.21 $\pm$ 0.11  | 0.54 $\pm$ 0.10  | 0.93 $\pm$ 0.09  |
| 14    | 66.1           | 2800                   | C28                                | 2.76 $\pm$ 0.35                       | 9.74 $\pm$ 1.51  | 1.50 $\pm$ 0.07  | 7.97 $\pm$ 0.30  |
| 15    | 66.25          | 3365                   | DiMeC27 (3,9-;3,11-;3,13-; 3,15-)  | 5.47 $\pm$ 0.50                       | 7.92 $\pm$ 0.26  | 1.52 $\pm$ 0.12  | 3.38 $\pm$ 0.27  |
| 16    | 66.67          | 2832                   | MeC28 (9-; 11-; 12-; 13-; 14-; 15) | 3.68 $\pm$ 0.46                       | 3.88 $\pm$ 0.39  | -                | -                |
| 17    | 67.1           | 3340                   | MeC28 (4-)                         | 0.99 $\pm$ 0.16                       | 2.08 $\pm$ 0.15  | -                | -                |
| 18    | 67.85          | 2900                   | C29                                | 100.00 $\pm$ 0                        | 88.01 $\pm$ 1.11 | 53.79 $\pm$ 1.71 | 63.47 $\pm$ 1.26 |
| 19    | 68.35          | 2932                   | MeC29 (15-;13-;11-)                | 27.88 $\pm$ 1.21                      | 27.28 $\pm$ 0.49 | 5.31 $\pm$ 0.21  | 7.06 $\pm$ 0.33  |
| 20    | 68.5           | 3349                   | MeC29 (7-)                         | 10.62 $\pm$ 0.69                      | 10.94 $\pm$ 0.23 | 12.81 $\pm$ 0.64 | 29.72 $\pm$ 0.03 |
| 21    | 68.65          | 3373                   | MeC29 (5-)                         | 10.56 $\pm$ 0.62                      | 13.74 $\pm$ 0.29 | 10.64 $\pm$ 2.47 | 17.32 $\pm$ 0.36 |
| 22    | 69.05          | 3537                   | MeC29 (3-)                         | 43.45 $\pm$ 0.98                      | 40.60 $\pm$ 0.52 | 8.75 $\pm$ 0.38  | 13.12 $\pm$ 0.42 |
| 23    | 69.17          | 2987                   | DiMeC29 (5,x-)                     | 3.44 $\pm$ 0.08                       | 2.09 $\pm$ 0.12  | 1.48 $\pm$ 0.12  | 5.53 $\pm$ 0.20  |
| 24    | 69.45          | 3000                   | C30                                | 6.56 $\pm$ 0.52                       | 13.06 $\pm$ 0.72 | 5.00 $\pm$ 0.16  | 6.44 $\pm$ 0.52  |
| 25    | 69.58          | 3395                   | DiMeC29 (3,11-; 3,13-; 3,15-)      | 10.26 $\pm$ 0.30                      | 5.74 $\pm$ 0.31  | 1.24 $\pm$ 0.03  | 1.98 $\pm$ 0.20  |
| 26    | 70             | 3560                   | MeC30 (7-; 8- )                    | 6.96 $\pm$ 0.53                       | 4.97 $\pm$ 0.26  | 1.73 $\pm$ 0.19  | 2.88 $\pm$ 0.59  |

Supplementary Information (SI)

| S.No. | Retention Time | Linear Retention Index | Compound name           | Mean relative abundance (%) $\pm$ SEM |                  |                  |                  |
|-------|----------------|------------------------|-------------------------|---------------------------------------|------------------|------------------|------------------|
|       |                |                        |                         | HwAM                                  | HwAMF            | Adult male       | Adult female     |
| 27    | 70.77          | 3453                   | C31-ene                 | 4.19 $\pm$ 0.45                       | 3.49 $\pm$ 0.23  | 1.43 $\pm$ 0.20  | 41.43 $\pm$ 2.54 |
| 28    | 71.15          | 3100                   | C31                     | 98.98 $\pm$ 0.46                      | 100.00 $\pm$ 0   | 100.00 $\pm$ 0   | 81.25 $\pm$ 1.11 |
| 29    | 71.65          | 3131                   | MeC31 (15-;13;11-)      | 26.90 $\pm$ 0.99                      | 33.24 $\pm$ 0.54 | 39.54 $\pm$ 0.75 | 26.82 $\pm$ 1.15 |
| 30    | 71.85          | 2551                   | MeC31 (7-)              | 26.70 $\pm$ 0.89                      | 25.37 $\pm$ 0.83 | 55.15 $\pm$ 1.02 | 100.00 $\pm$ 0   |
| 31    | 72             | 2573                   | MeC31 (5-)              | 11.13 $\pm$ 0.64                      | 13.86 $\pm$ 0.38 | 23.09 $\pm$ 0.84 | 35.04 $\pm$ 0.46 |
| 32    | 72.3           | 3171                   | DiMeC31 (7,11-)         | 3.31 $\pm$ 0.43                       | 2.60 $\pm$ 0.33  | 3.14 $\pm$ 0.13  | 7.66 $\pm$ 0.40  |
| 33    | 72.45          | 2740                   | MeC31 (3-)              | 14.60 $\pm$ 0.51                      | 26.37 $\pm$ 1.28 | 17.61 $\pm$ 0.39 | 20.71 $\pm$ 1.36 |
| 34    | 72.57          | 3178                   | DiMeC31 (7,x-)          | 3.07 $\pm$ 0.21                       | 2.84 $\pm$ 0.16  | 4.83 $\pm$ 0.39  | 18.54 $\pm$ 1.04 |
| 35    | 72.9           | 3200                   | C32                     | 3.67 $\pm$ 0.30                       | 7.44 $\pm$ 0.41  | 3.58 $\pm$ 0.13  | 4.92 $\pm$ 0.45  |
| 36    | 73.2           | 2750                   | MeC32 (6-)              | 2.62 $\pm$ 0.26                       | 4.16 $\pm$ 0.29  | 4.20 $\pm$ 0.12  | 6.45 $\pm$ 0.17  |
| 37    | 74.1           | 3074                   | TetraMeC31 (3,7,11,15-) | 1.28 $\pm$ 0.05                       | 4.20 $\pm$ 0.26  | 3.71 $\pm$ 0.67  | 3.28 $\pm$ 0.72  |
| 38    | 75.05          | 3300                   | C33                     | 29.64 $\pm$ 0.41                      | 27.96 $\pm$ 1.58 | 2.60 $\pm$ 0.29  | 6.49 $\pm$ 0.09  |
| 39    | 75.7           | 3335                   | MeC33 (15-;13-;11-)     | 34.69 $\pm$ 0.55                      | 42.78 $\pm$ 2.13 | 47.27 $\pm$ 3.08 | 31.86 $\pm$ 3.03 |
| 40    | 75.95          | 2775                   | MeC33 (7-)              | 4.38 $\pm$ 0.12                       | 4.20 $\pm$ 0.21  | 7.50 $\pm$ 0.66  | 10.23 $\pm$ 0.15 |
| 41    | 76.22          | 2858                   | MeC33 (5-)              | 5.30 $\pm$ 0.22                       | 7.78 $\pm$ 0.93  | 6.98 $\pm$ 0.35  | 5.47 $\pm$ 0.43  |
| 42    | 76.54          | 2810                   | DiMeC33 (11,15-;11,21)  | 14.23 $\pm$ 0.52                      | 16.59 $\pm$ 0.56 | 25.45 $\pm$ 2.51 | 10.33 $\pm$ 1.55 |
| 43    | 76.7           | 3012                   | DiMeC33 (7,19-; 7,23-)  | 5.26 $\pm$ 0.18                       | 5.71 $\pm$ 0.40  | 11.09 $\pm$ 0.31 | 11.13 $\pm$ 0.99 |
| 44    | 76.85          | 2939                   | MeC33 (3-)              | 22.41 $\pm$ 0.83                      | 27.03 $\pm$ 1.13 | 10.05 $\pm$ 1.22 | 21.64 $\pm$ 1.12 |
| 45    | 77.6           | 2610                   | DiMeC33 (3,17-; 3,15-)  | 5.79 $\pm$ 0.14                       | 11.30 $\pm$ 1.40 | 10.50 $\pm$ 1.18 | 11.92 $\pm$ 1.38 |
| 46    | 79.25          | 3260                   | TetraMeC33 (3,7,11,15-) | 6.57 $\pm$ 0.19                       | 12.06 $\pm$ 1.26 | 9.48 $\pm$ 1.48  | 6.74 $\pm$ 0.91  |
| 47    | 80.4           | 3500                   | C35                     | 3.38 $\pm$ 0.13                       | 2.68 $\pm$ 0.34  | -                | -                |
| 48    | 81.3           | 3524                   | MeC35 (17-)             | 18.59 $\pm$ 0.80                      | 22.02 $\pm$ 2.42 | 14.03 $\pm$ 2.16 | 12.06 $\pm$ 1.82 |
| 49    | 82.2           | 3532                   | MeC35 (15-;13-;11-)     | 26.47 $\pm$ 1.73                      | 40.08 $\pm$ 4.83 | 31.74 $\pm$ 4.33 | 12.63 $\pm$ 2.08 |
| 50    | 82.7           | 2950                   | MeC35 (7-)              | 5.50 $\pm$ 0.99                       | 6.22 $\pm$ 0.42  | 9.41 $\pm$ 1.15  | 15.80 $\pm$ 1.93 |
| 51    | 83.05          | 2971                   | MeC35 (5-; 3-)          | 16.31 $\pm$ 1.72                      | 21.11 $\pm$      | 2.46             | 10.57 $\pm$ 1.89 |
| 52    | 89.3           | 3730                   | MeC37 (17-)             | 1.96 $\pm$ 0.05                       | 3.01 $\pm$ 0.51  | 2.55 $\pm$ 0.45  | 2.85 $\pm$ 0.41  |
| 53    | 90.5           | 3722                   | MeC37 (15-; 13-)        | 8.65 $\pm$ 0.48                       | 16.34 $\pm$ 3.04 | 7.88 $\pm$ 0.70  | 3.82 $\pm$ 0.48  |
